# Supplementary material for: Evolution and enrichment of CYP5035 in Polyporales: functionality of an understudied P450 family
Source: PubMed Central journal article supplement (PMC8426240; doi:10.1007/s00253-021-11444-2), 2021-08-30
Supplement: 253_2021_11444_MOESM1_ESM.pdf [file 253_2021_11444_MOESM1_ESM.pdf]

**Applied Microbiology and Biotechnology**

**Supporting Information**

for

**Evolution and Enrichment of  
CYP5035 and CYP5136 in  
*Polyporales*: Functionality of an  
understudied P450 family**

Nico D. Fessner,<sup>1</sup> David R. Nelson<sup>2</sup> and Anton Glieder<sup>1,\*</sup>

1 Institute of Molecular Biotechnology, Graz University of Technology, NAWI Graz, Petersgasse 14/3, Austria

2 Department of Microbiology, Immunology and Biochemistry, University of Tennessee Health Science Center, Memphis, TN 38163, USA

\* corresponding author: Anton Glieder

E-mail: [a.glieder@tugraz.at](mailto:a.glieder@tugraz.at)

phone: (+43)-316-873-4074

Fax: (+43)-316-873-9302

**Table S1:** Displayed are all CYP5035 expressed here and in prior literature so far together with their tested substrate tolerance, host fungus and corresponding reference.

| Reference                  | Fungus                             | CYP5035... | Sequence ID | Substrate                                                     |
|----------------------------|------------------------------------|------------|-------------|---------------------------------------------------------------|
| 10.1016/j.bbrc.2011.02.121 | <i>Phanerochaete chrysosporium</i> | A1         | 7306        | naproxen                                                      |
|                            |                                    | A2         | 138612      | naproxen                                                      |
|                            |                                    | A3         | 8961        | ?                                                             |
|                            |                                    | A4         | 8962        | ?                                                             |
|                            |                                    | A5         | 138737      | flavone                                                       |
|                            |                                    | A6         | 5333        | ?                                                             |
|                            |                                    | A7         | 8949        | ?                                                             |
|                            |                                    | B1         | –           | ?                                                             |
|                            |                                    | B2         | 8912        | naproxen & abietic acid                                       |
|                            |                                    | B3         | 6048        | ?                                                             |
|                            |                                    | C1         | 9198        | ?                                                             |
|                            |                                    | D1         | –           | ?                                                             |
|                            |                                    | E1         | 5317        | ?                                                             |
| 10.1007/s00203-011-0753-2  | <i>Postia placenta</i>             | F1         | 112190      | ?                                                             |
|                            |                                    | F2         | 129155      | ?                                                             |
|                            |                                    | F3v1       | 89499       | ?                                                             |
|                            |                                    | F3v2       | 89499       | ?                                                             |
| This study                 | <i>Polyporus arcularius</i>        | H2         | 665169      | ( <i>EZ</i> )-citral, <i>p</i> -cymene, indole                |
|                            |                                    | N5         | 196845      | ?                                                             |
|                            |                                    | N6         | 521854      | ?                                                             |
|                            |                                    | S6         | 652223      | ( <i>E</i> )-stilbene                                         |
|                            |                                    | S7         | 664247      | <b>multi-functional</b>                                       |
|                            |                                    | S8         | 665466      | ?                                                             |
|                            |                                    | S9         | 668252      | ( <i>E</i> )-stilbene, ( <i>EZ</i> )-citral, <i>p</i> -cymene |
|                            |                                    | AU1        | 519317      | ?                                                             |
|                            |                                    | AV1        | 667965      | ?                                                             |

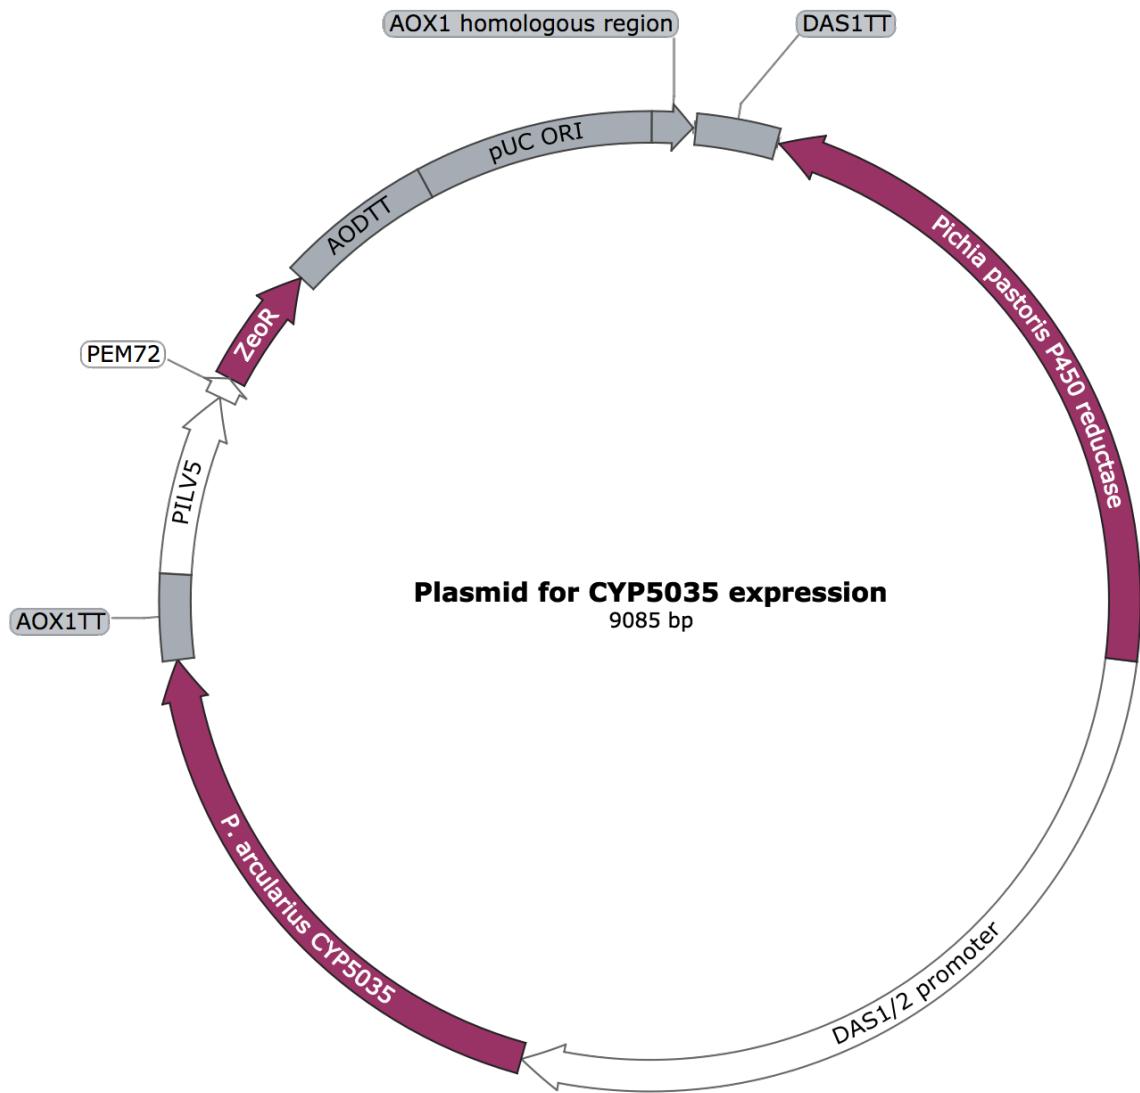

**Fig. S1:** Plasmid used for the coexpression of the CYP5035 enzymes and *P. pastoris*' native P450 reductase enzyme in the yeast.

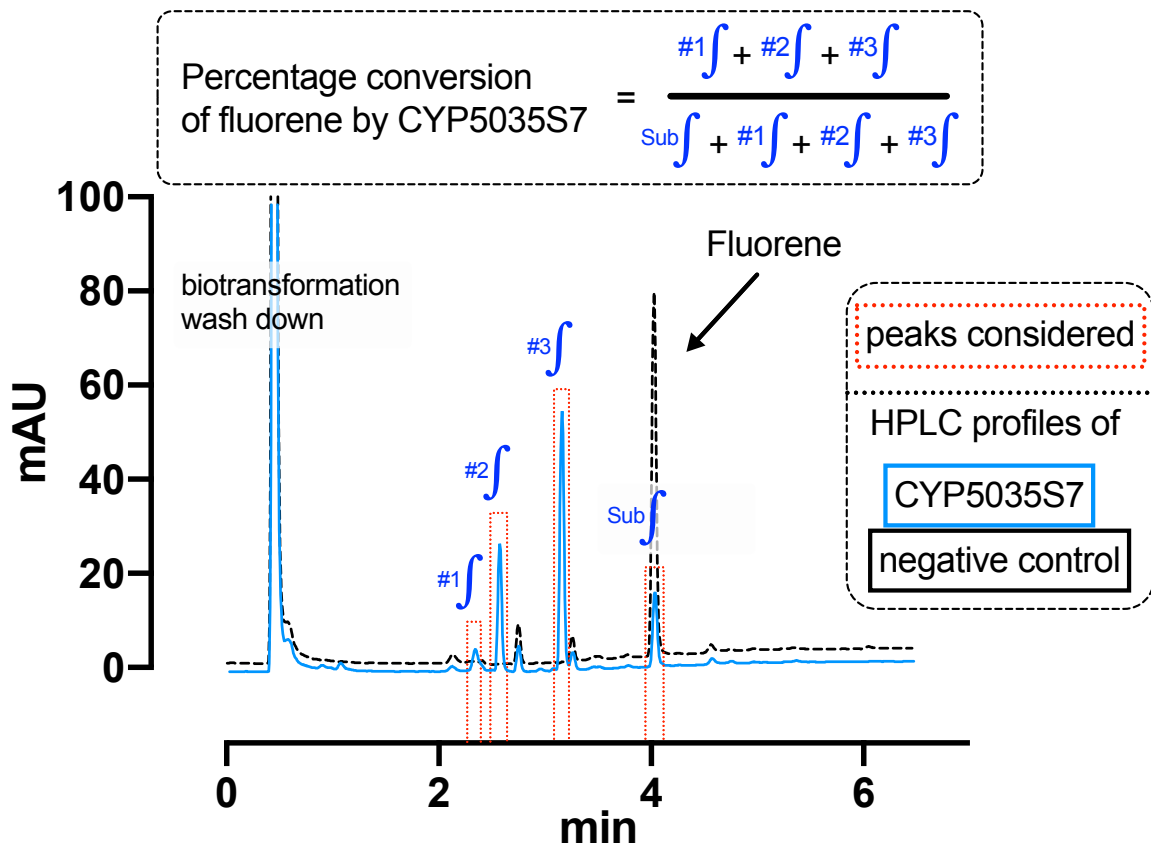

**Fig. S2:** Displayed are the HPLC biotransformation profiles of CYP5035S7 and the empty vector control to show the general procedure of how the percentage conversions of each compound listed in Fig. 4 were calculated. Peaks were integrated and the fraction of the combined areas of new peaks that were not present in the negative control divided by the former plus the substrate peak area.

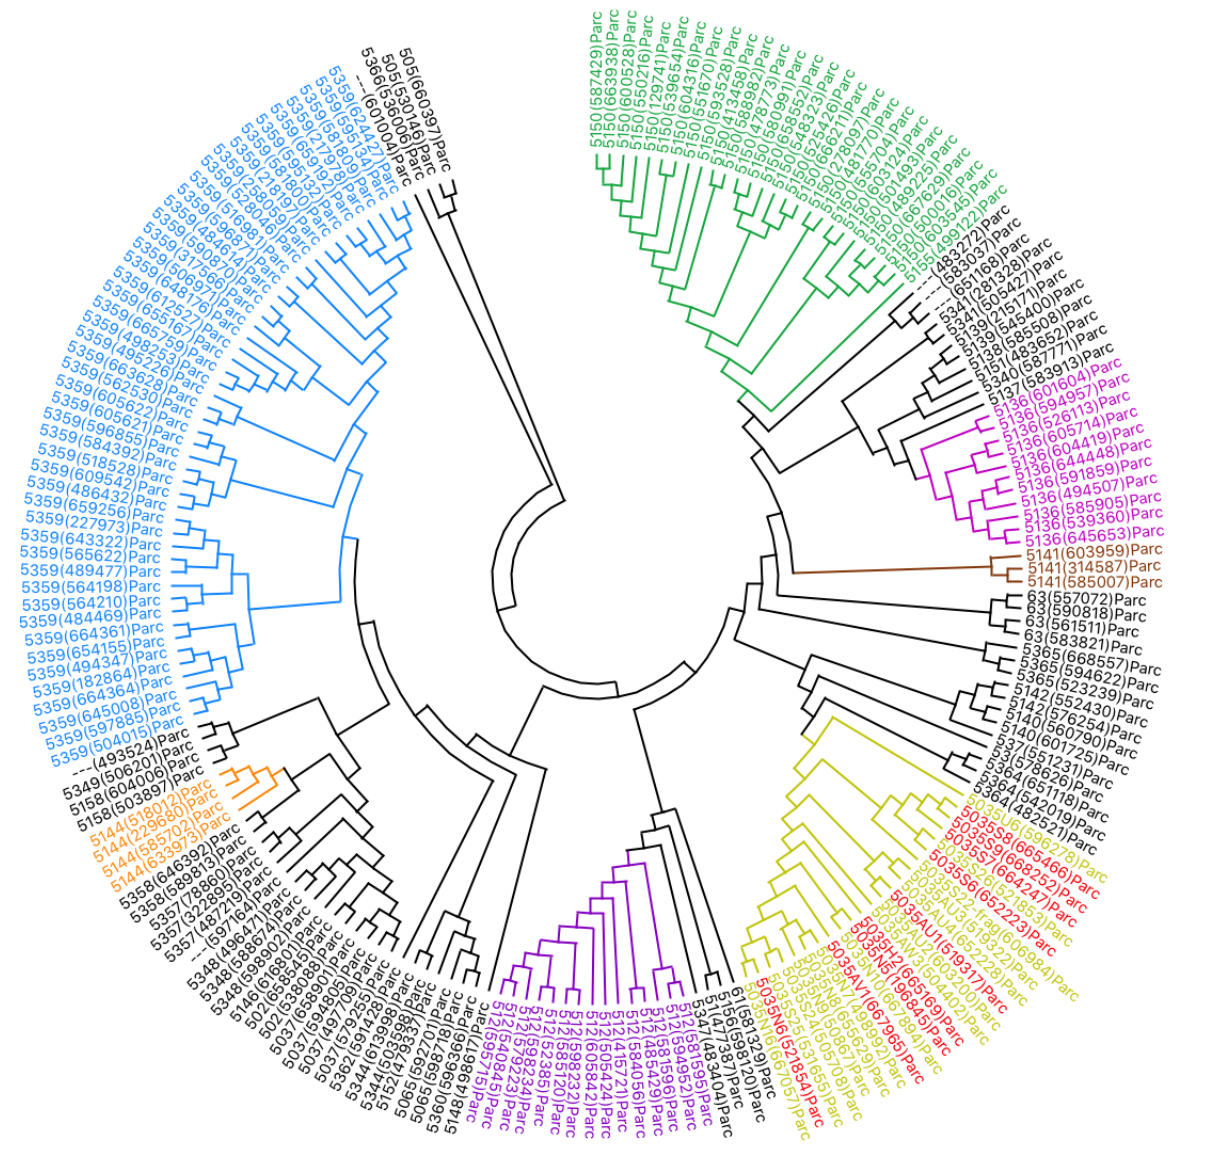

**Fig. S3:** A minimum evolution tree of the P450ome of *P. arcularius* involving 193 amino acid sequences. CYP512 (purple), CYP5035 (dark yellow), CYP5136 (violet), CYP5141 (brown), CYP5144 (orange), CYP5150 (green) and CYP5359 (blue) have been coloured. The P450 nomenclature of the CYP5035 selected and expressed for a functional screening is shown in red. The tree was constructed using the close-neighbour-interchange algorithm in MEGA X.

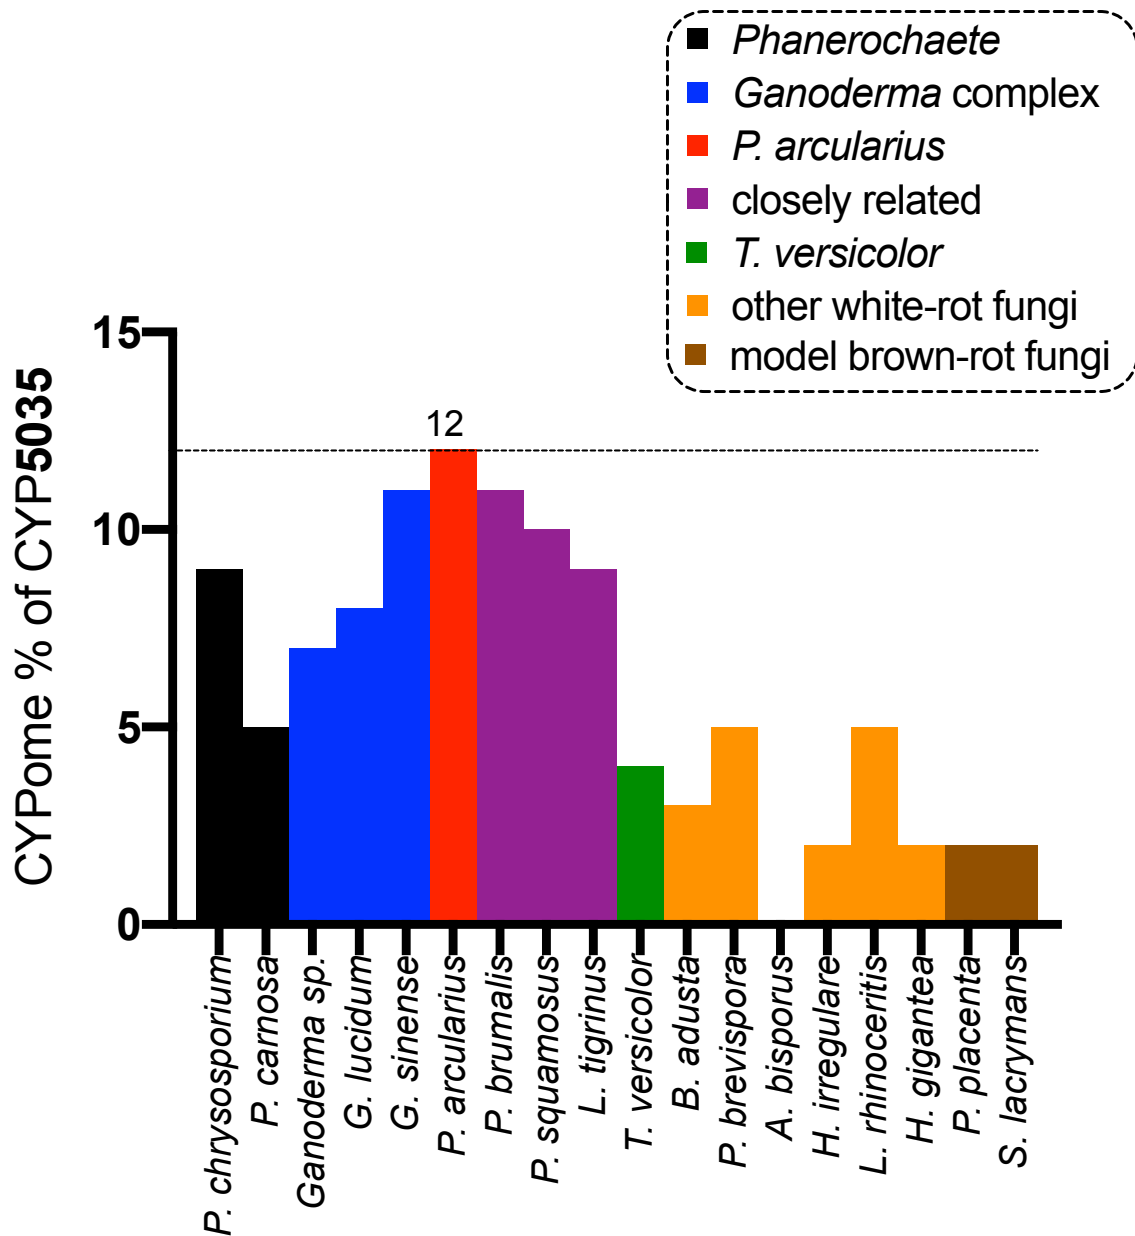

**Fig. S4:** Comparison of the number of CYP5035s as a percentage of the total number P450s in the genome of *P. arcularius* versus a variety of white- and brown-rot fungi.

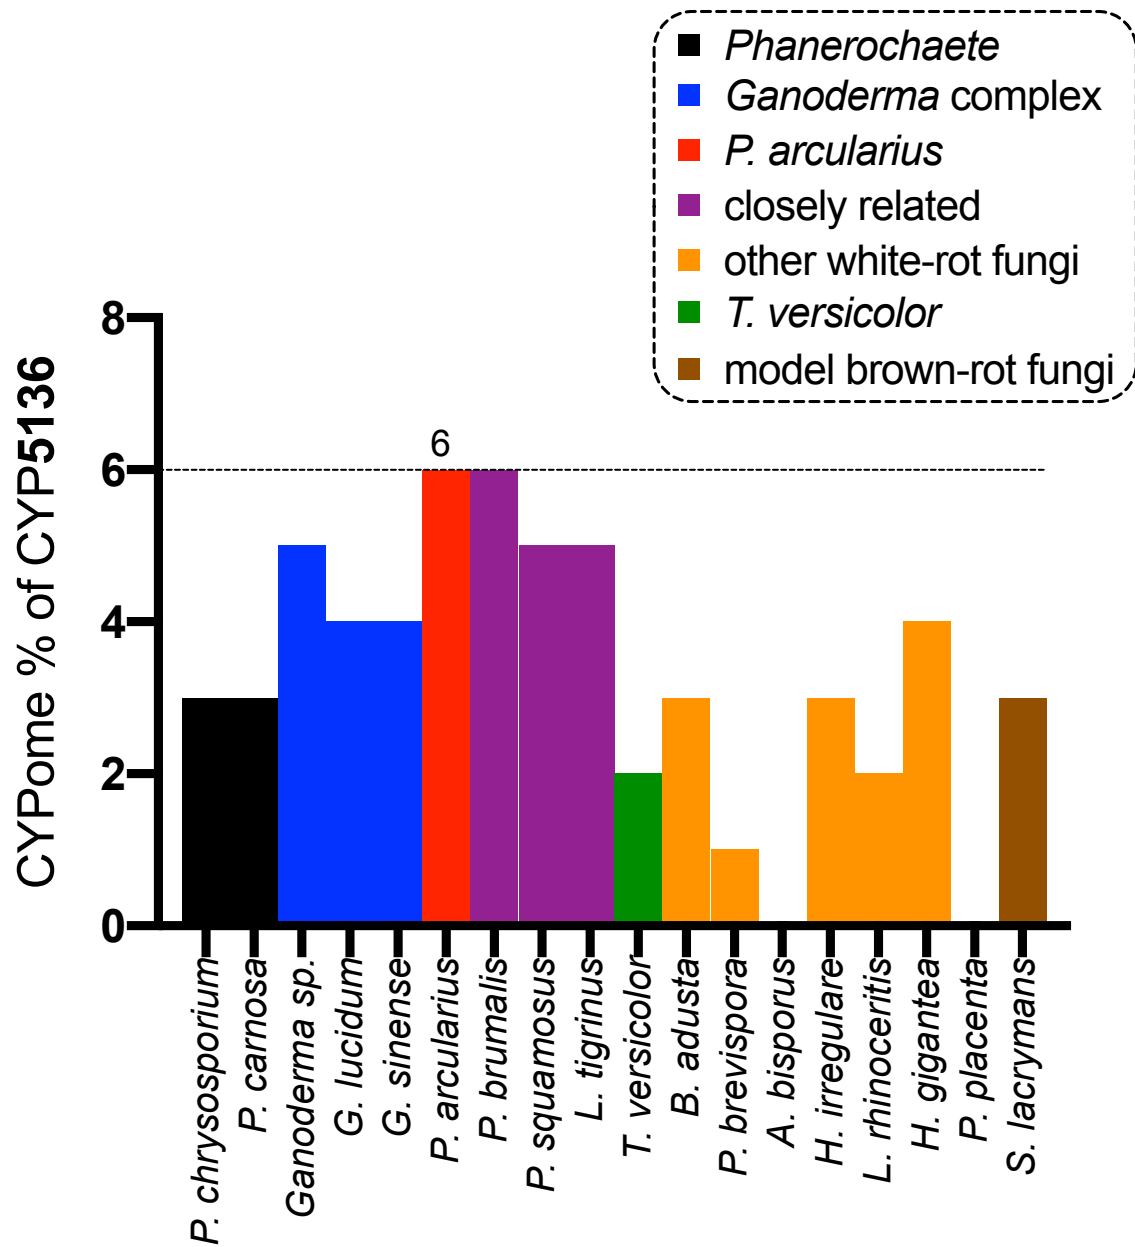

**Fig. S5:** Comparison of the number of CYP5136s as a percentage of the total number P450s in the genome of *P. arcularius* versus a variety of white- and brown-rot fungi.

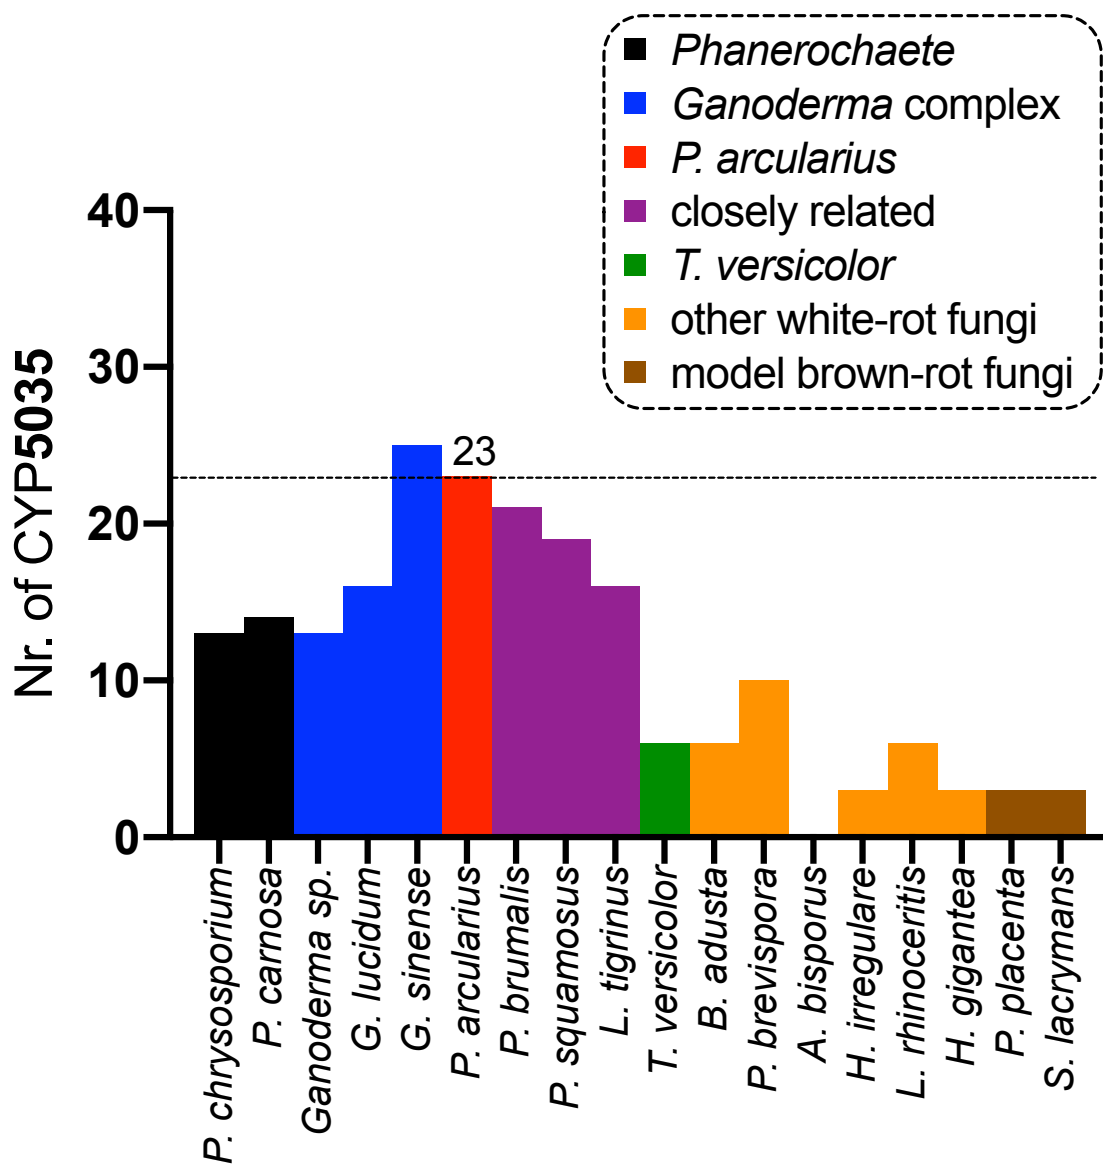

**Fig. S6:** Comparison of the number of CYP5035 in the genome of *P. arcularius* versus a variety of white- and brown-rot fungi.



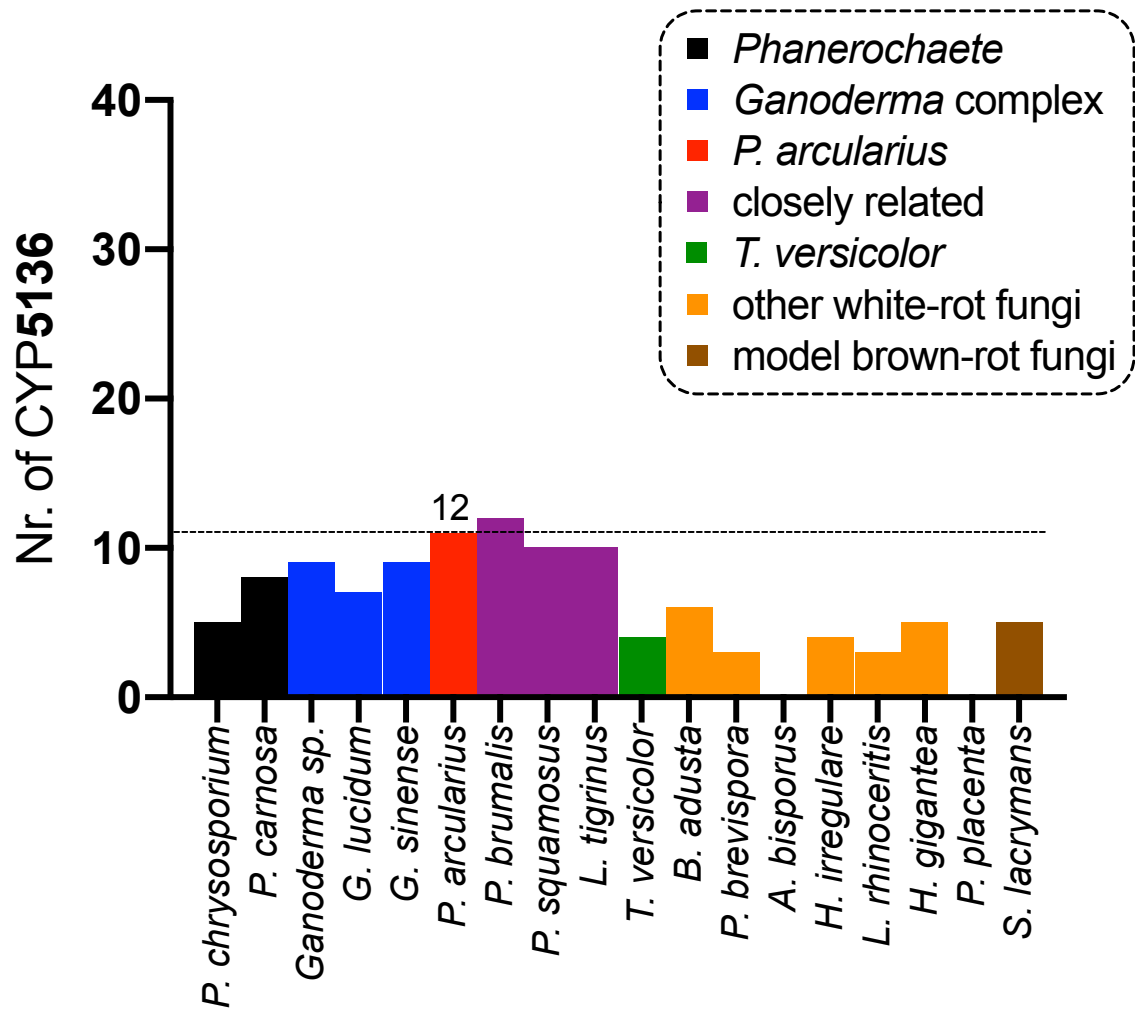

**Fig. S7:** Comparison of the number of CYP5136 in the genome of *P. arcularius* versus a variety of white- and brown-rot fungi.

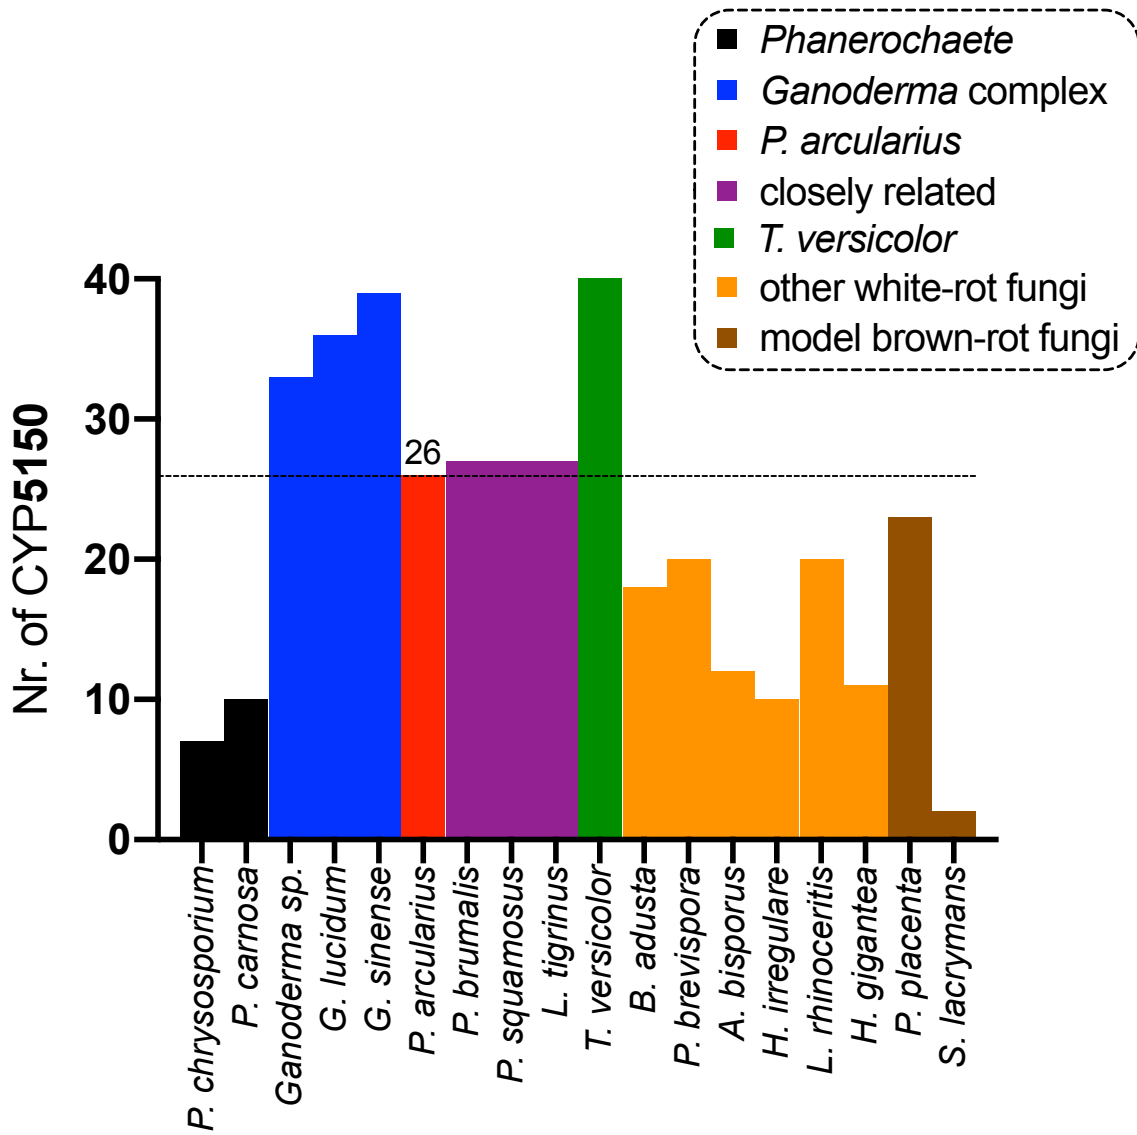

**Fig. S8:** Comparison of the number of CYP5150 in the genome of *P. arcularius* versus a variety of white- and brown-rot fungi.

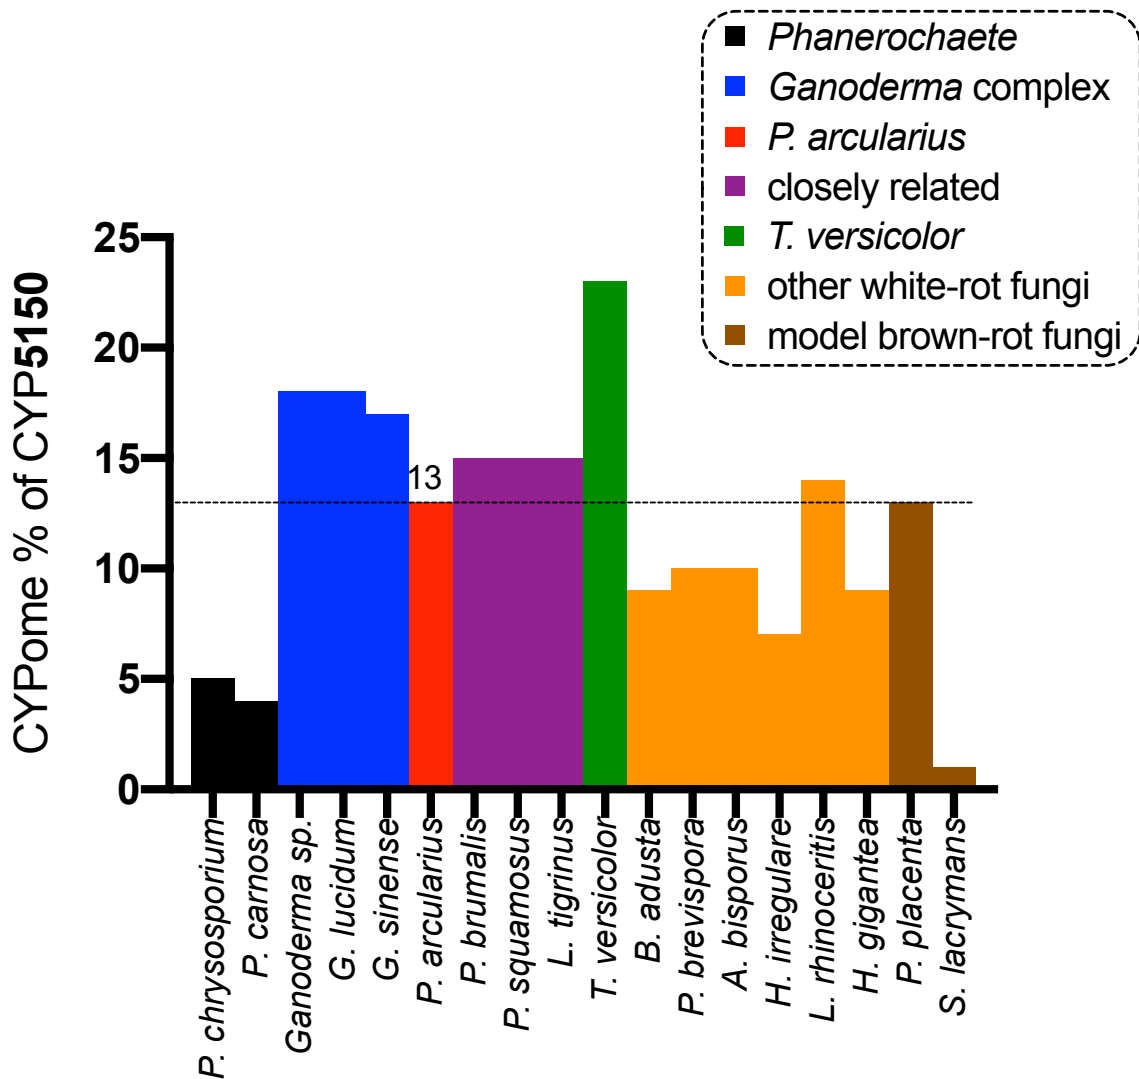

**Fig. S9:** Comparison of the number of CYP5150s as a percentage of the total number P450s in the genome of *P. arcularius* versus a variety of white- and brown-rot fungi.

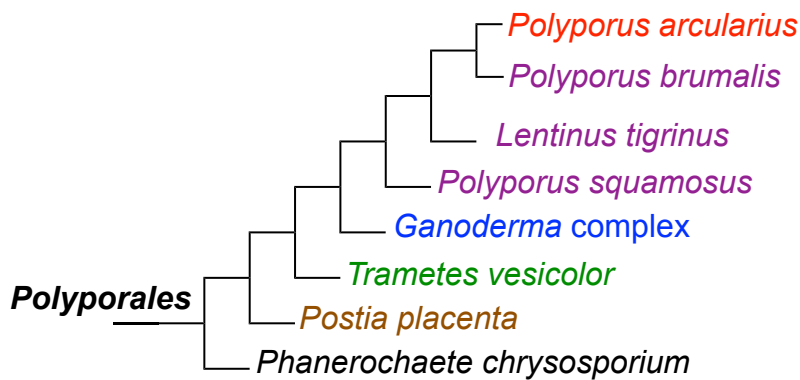

**Fig. S10:** Rough re-make of the phylogenetic trees drawn in previous studies illustrating the evolutionary distances of different model wood-degrading polypore fungi, and white-rot fungi selected and analysed in this study (Justo and Hibbett 2011; Floudas et al. 2012; Binder et al. 2013).

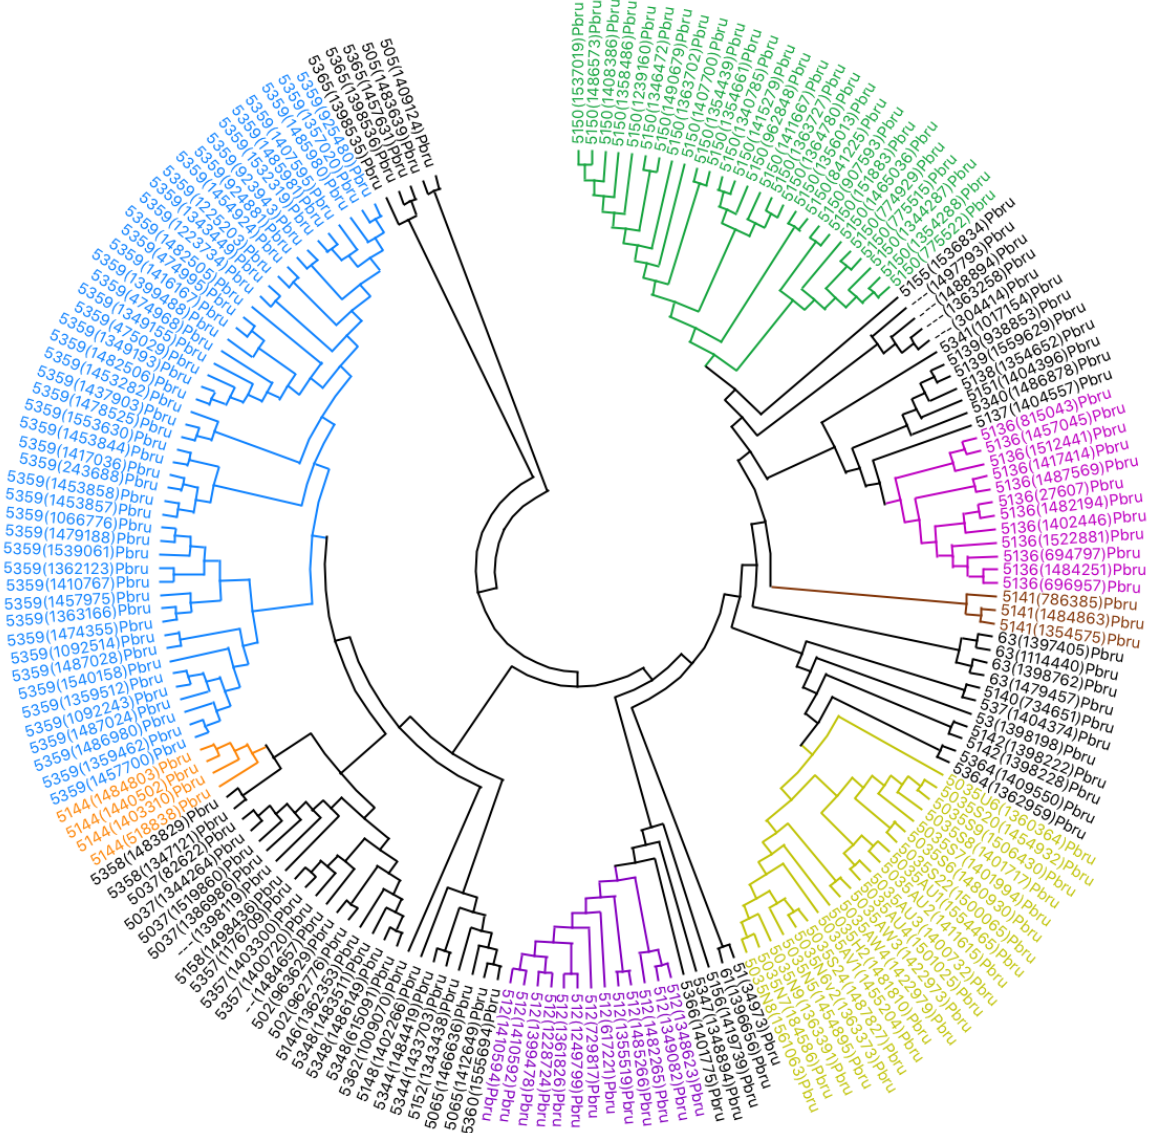

**Fig. S11:** A minimum evolution tree of the P450ome of *P. brumalis* involving 186 amino acid sequences. CYP512 (purple), CYP5035 (dark yellow), CYP5136 (violet), CYP5141 (brown), CYP5144 (orange), CYP5150 (green) and CYP5359 (blue) have been coloured. The tree was constructed using the close-neighbour-interchange algorithm in MEGA X.

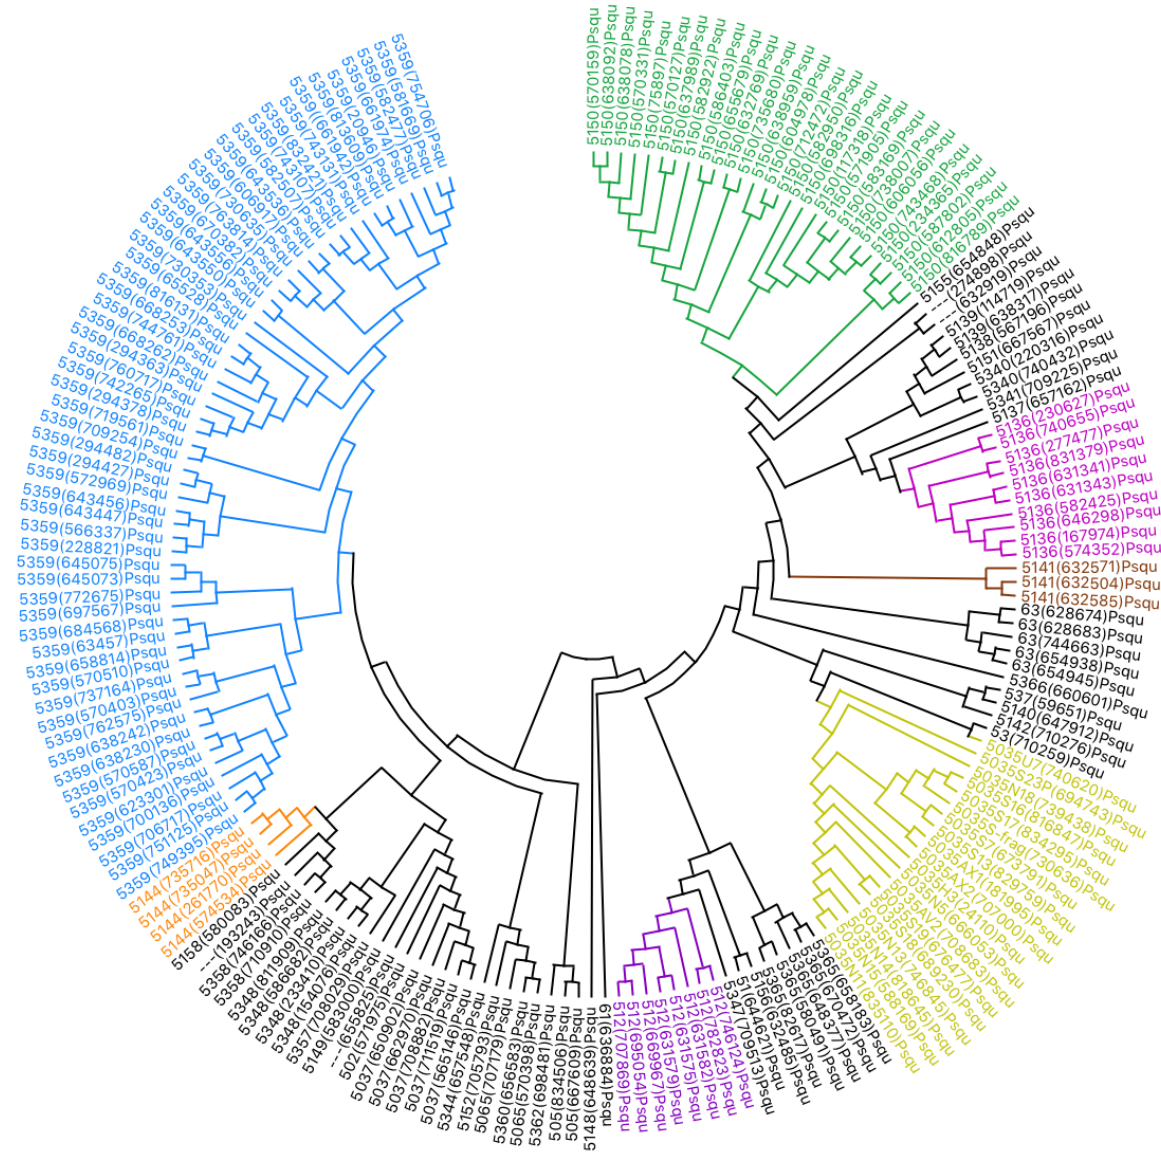

**Fig. S12:** A minimum evolution tree of the P450ome of *P. squamosus* involving 184 amino acid sequences. CYP512 (purple), CYP5035 (dark yellow), CYP5136 (violet), CYP5141 (brown), CYP5144 (orange), CYP5150 (green) and CYP5359 (blue) have been coloured. The P450 nomenclature of the CYP5035 selected and expressed for a functional screening is shown in red. The tree was constructed using the close-neighbour-interchange algorithm in MEGA X.

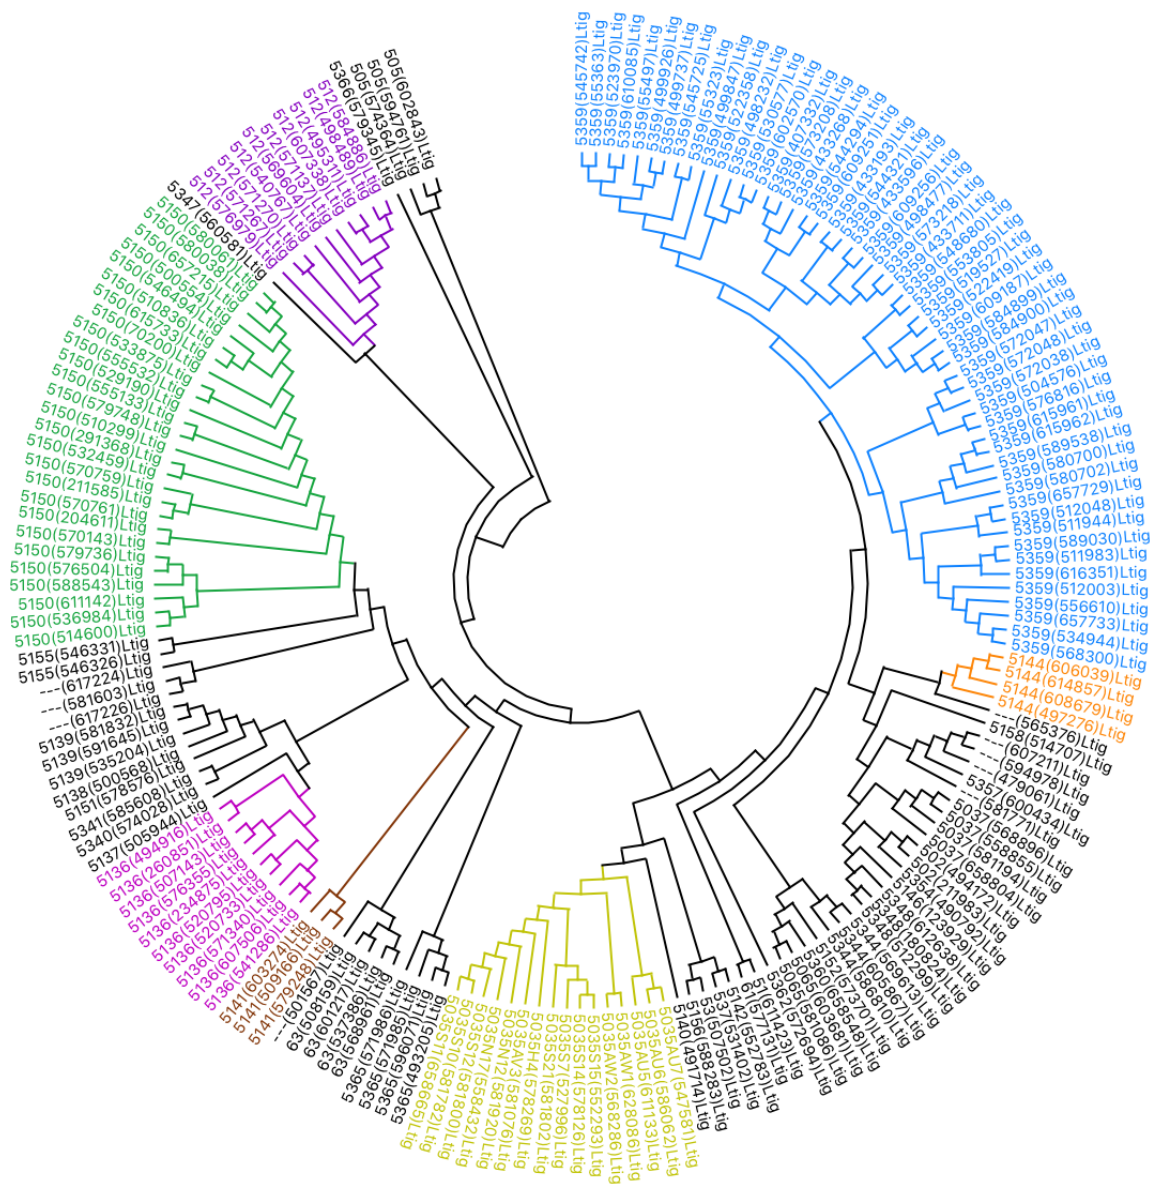

**Fig. S13:** A minimum evolution tree of the P450ome of *L. tigrinus* involving 184 amino acid sequences. CYP512 (purple), CYP5035 (dark yellow), CYP5136 (violet), CYP5141 (brown), CYP5144 (orange), CYP5150 (green) and CYP5359 (blue) have been coloured. The P450 nomenclature of the CYP5035 selected and expressed for a functional screening is shown in red. The tree was constructed using the close-neighbour-interchange algorithm in MEGA X.

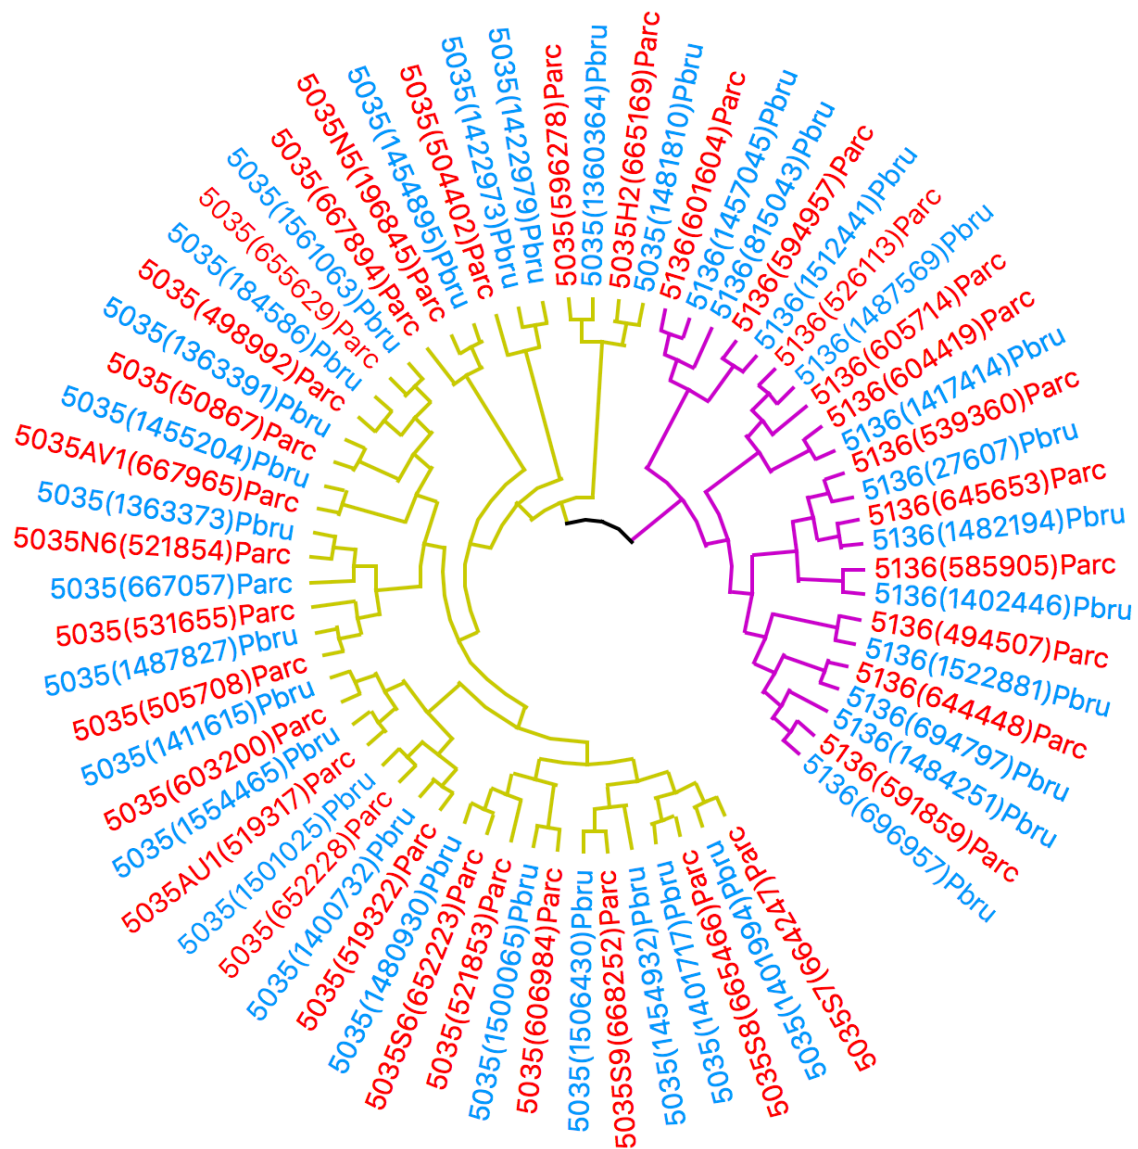

**Fig. S14:** Displayed is a minimum evolution tree of the CYP5035 and CYP5136 families of *P. arcularius* (Parc; red) and *P. brumalis* (Pbru; blue). Evidence for their close phylogeny is an alternating pattern of red and blue sequences almost throughout the tree. This analysis involved 67 amino acid sequences. The tree was constructed using the close-neighbour-interchange algorithm in MEGA X.

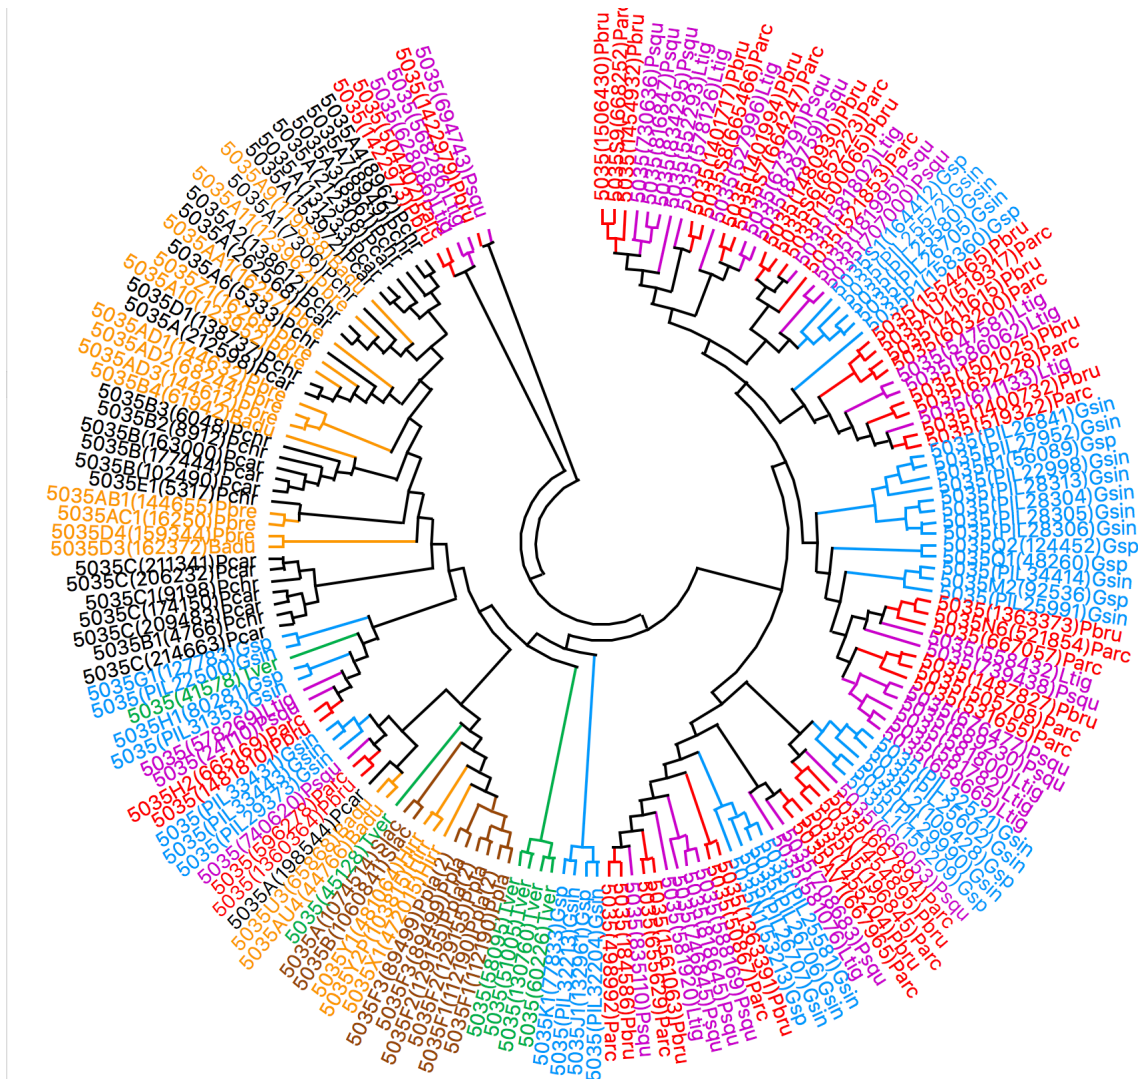

**Fig. S15:** Displayed is a minimum evolution tree of the CYP5035 family involving 174 amino acid sequences. Phylogeny of CYP5035 enzymes of the fungus *P. arcularius* and *P. brumalis* (Parc and Pbru; red) compared to related species *L. tigrinus* and *P. squamosus* (Ltig and Psqu; violet), and the other model white-rot fungi *Ganoderma* sp. and *G. sinense* (Gsp and Gsin; blue), *T. versicolor* (Tver; green), *P. chrysosporium* and *P. carnosa* (Pchr and Pcar; black), *B. adusta* and *P. brevispora* and *Heterobasidion irregulare* (Badu and Pbre and Hirr; orange) as well as brown-rot fungi *P. placenta* and *Serpula lacrymans* (Ppla and Slac; brown) in order to get an insight into the evolution of this P450 family. The tree was constructed using the close-neighbour-interchange algorithm in MEGA X.



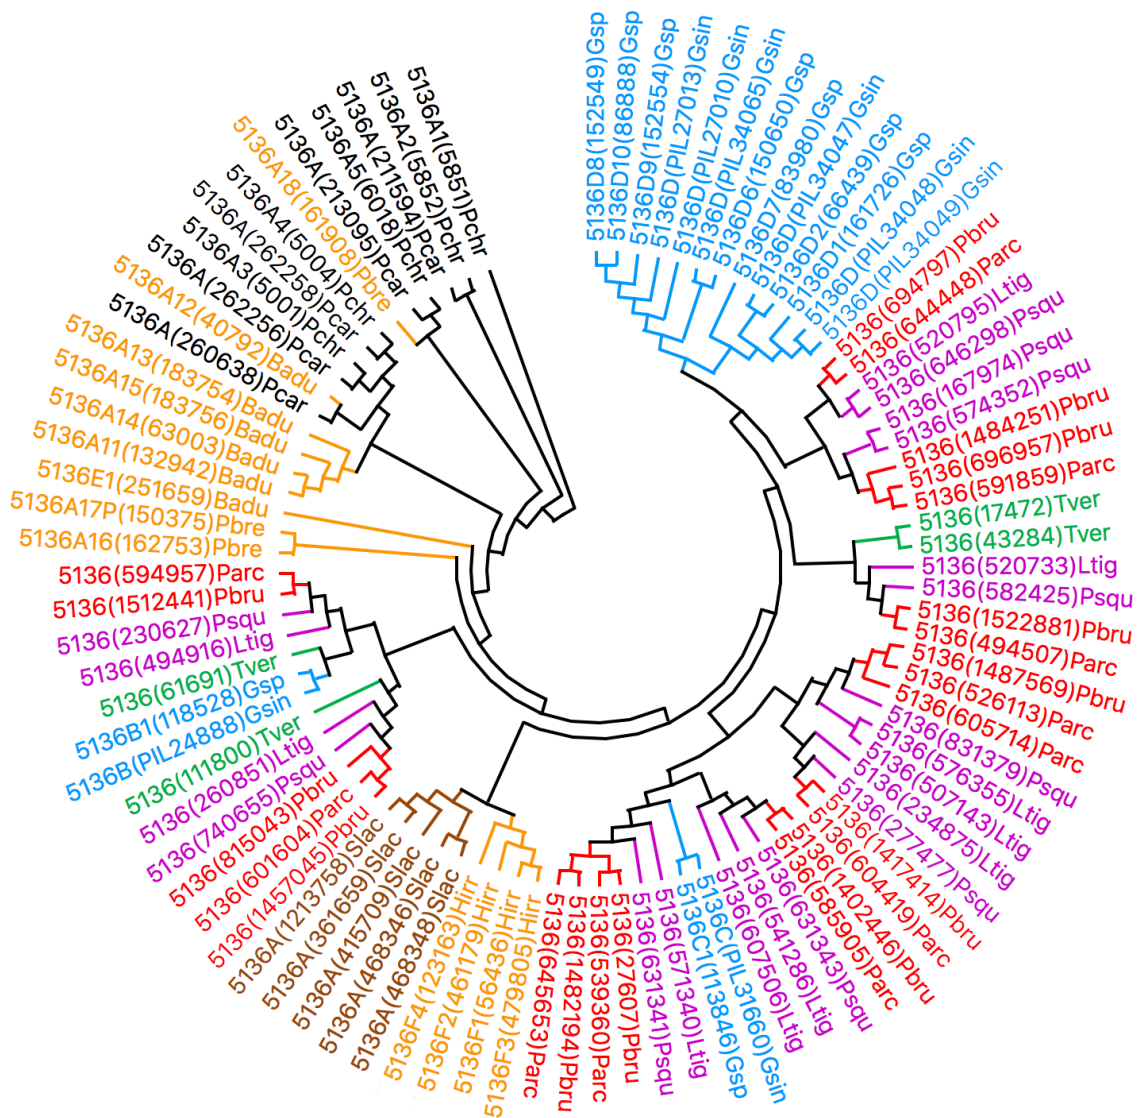

**Fig. S16:** Displayed is a minimum evolution tree of the CYP5136 family involving 92 amino acid sequences. Phylogeny of CYP5136 enzymes of the fungus *P. arcularius* and *P. brumalis* (Parc and Pbru; red) compared to related species *L. tigrinus* and *P. squamosus* (Ltig and Psqu; violet), and the other model white-rot fungi *Ganoderma* sp. and *G. sinense* (Gsp and Gsin; blue), *T. versicolor* (Tver; green), *P. chrysosporium* and *P. carnosa* (Pchr and Pcar; black), *B. adusta* and *P. brevispora* and *H. irregulare* (Badu and Pbre and Hirr; orange) as well as brown-rot fungus *Serpula lacrymans* (Slac; brown) in order to get an insight into the evolution of this P450 family. The tree was constructed using the close-neighbour-interchange algorithm in MEGA X.

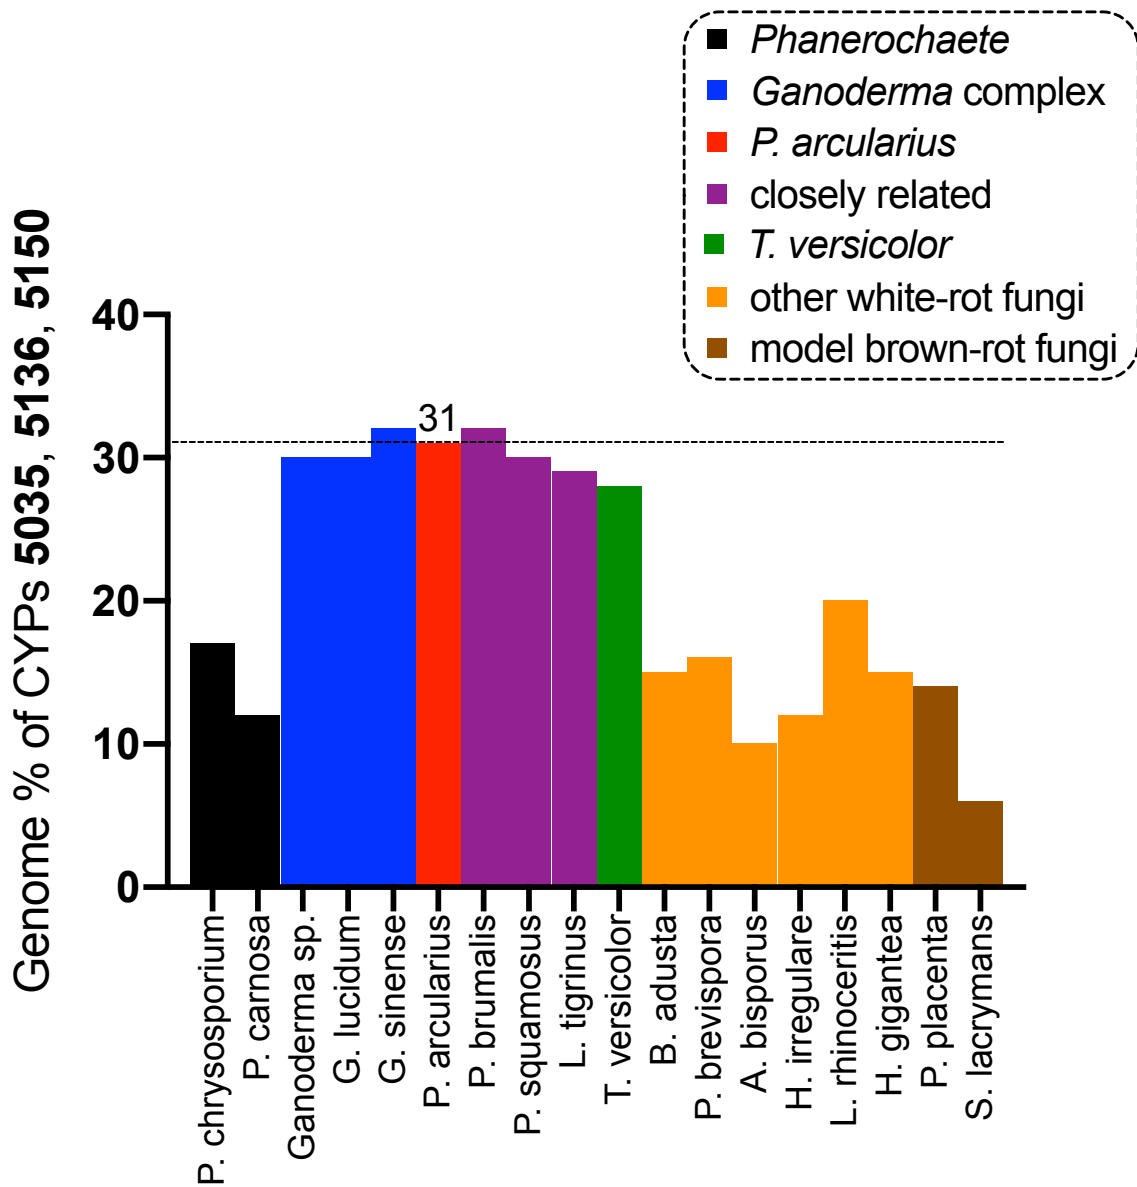

**Fig. S17:** Comparison of the P450 families 5035, 5136 and 5150 as a percentage of the total number P450s in the genome of *P. arcularius* versus a variety of white- and brown-rot fungi.

## Sequences used in this study:

### 1. CYP5035N5 of *P. arcularius* (JGI: 196845; NCBI accession number: TFK85288.1)

MELDGHIVVWSPERLTATYA AVLGLLTHQVFRRHETYSIAHLTLLLAPLLIALTVSDSWQCIPKTRLLVSYAAYL  
STLVLSLVSYRLSPLHLARYPGPLGCRVSKLWMAASLRAGYQHVVYRDLHKRYGSVVRIGPNELSIREPSAVMALV  
GPSGLPKGPHVTGRLLTDKDLPMIGIEDLSTHMTRRRAWNRGFSAAIAEYEELVGRRAMQLVQRLEE HQKQVD  
IERWFDYFSYDAMCDMTFGGSELLRDGDENNVSLSAGMTAMTFFGHVPWLG VYFGYLPAAATRIKSLAAC  
KGLVEQRMQQGSRTRDLFHYLNHEDQMEQSPPPMRQLVDDGILAIVGGADTVSGALTSVIFCLLTHPETYDKLQVE  
VDKYPPGEDVSSTRWHRDMKYLEAVINETLRVYSPGLGGSQRKVPADGPGVTGSLYIPPGTALWVHAFSLHRD  
PSNFFPDDFWPERWLLAPHSPDLLSPEAADAKPTNFVHNEEAYMPFSHGPMNCVGNFALMEMRIVICALVQ  
RFRFRLREDYDRADYDRNFKDYLIASRPNLPIIHELRE

#### >CYP5035N5

ATGGAGCTGGACGGGCACATCTATGTATGGTCTCCTGAGAGACTCACTGCCACATATGCTGCGGTTCTTGGATTG  
CTAACACATCAAGTCTTCCGTCGGCATGAGACTTACTGCATCTCCGCTCACCTTACCCTACTGCTCGCTCCGCCCTT  
ACTGATCGCACTTACAGTCTCTGACTCGTGGCAATGCATACCAAAGACAAGACTATTGGTCTCATATGCGGCGTA  
TCTCTACTCTCGTACTGTCCCTCGTTTCTACCCTCTCTCCATTACATCCTCTCGCGCGCTACCCCGTCTCTC  
TCGGTTGCAGGGTGTCCAAGCTGTGGATGGCGTCCCTCTCGCGGGCAGGATACCAACACGTTTACTATAGGGACCT  
GCACAAGCGATACGGAAGCGTGTACGAATTGGTCCGAATGAGTCTCAATTCGCGAACCTTCGGCGGTGATGGC  
CCTGGTAGGCCGAGCGGACTACCGAAAGGGCCTCATGTACCGGTAGGCTGCTCACCGACAAGGACCTCCCGATG  
ATAGGCATCGAGGACTTGTCTACTCATATGACGCGCCGCGGAGCCTGGAACCGTGGCTTCAGCTCCGCCGCATAG  
CAGAATATGAGGAACTCGTTGGACGACGTGCCATGCAGCTGGTGCAGAGGCTGGAAGAGCACCAGGGCAAGCAAG  
TCGACATAGAGCGCTGGTTTCGACTACTTCTCGTACGACGCGATGTGCGACATGACGTTTCGGCGGCGGGTCTGA  
TCTACGAGACGGAGACGAGAACAACGTCTGGTCCGTGCTCAGCGCAGGGATGACTGCGATGACGTTCTTCGGTCA  
TGTTCCGTGGTTGGGAGTCTACTTTGGTTACCTTCCGGCTGCGACACGTCCGATCAAGTCACTCCTTGCTGCATGC  
AAGGGTCTAGTCGAGCAGCGCATGCAGCAAGGTTTCGGGACCCGCGACTTATTCCATTATCTGAATCACGAAGAT  
CAGATGGAACAATCTCCACCCCAATGCGCCAGCTCGTCGACGACGGTATCTTGGCCATTGTTGGCGGAGCGGACA  
CCGTATCGGGCGCACTACAAGCGTGATCTTCTGCCTGCTCACCCACCCGAGACCTACGACAAGCTTCAAGTCCA  
AGTCGACAAGTACTATCCTCCCGGCGAGGACGTGTCCAGCACCAGATGGCATCGAGACATGAAGTACCTGGAGGC  
CGTCATAAACGAGACACTGCGTGTATACTCGCCCCGCTTGGCGGCTCGCAGCGCAAGGTCCTGCAGACGGTCTC  
GGGGTGACAGTGGGCTCGTTGTACATCCACCCGGAACGGCGTTATGGGTGCACGCGTTCTCGCTACACCGTGACC  
CGAGCAACTTCTTCCCTTCCCAGACGACTTCTGGCCGGAACGCTGGCTCCTCGCCCCCACTCACCCGACCTCCTC  
TCTCCGGAAGCCGCGGATGCGAAGCCAACGAACCTTCGTGCACAACGAGGAGGCATACATGCCATTCTCGCACGGGC  
CGATGAACTGCGTCGGGAAGAACTTTGCACTAATGGAAATGCGCATCGTCATCTGCGCACTCGTGCAGCGGTTCC  
GCTTCCGGTTGCGGGAGGACTACGACCGCGCAGATTACGACCGCAACTTCAAGGACTACTTGATCGCTTCCGGCC  
GAACCTTCCGGTCATCATTGAACTGCGGGAATGA

### 2. CYP5035AU1 of *P. arcularius* (JGI: 519317; NCBI accession number: TFK89225.1)

MLKRAYSSPGAVSVALALITHQVFRRYETYSWFIHGCLLFGPPTLVATFVSDTADTTRSLLQGFFRALPIHLITLSIV  
ILYRLSPLHPLAGYPGLSRKVSMLVPAYLSLSGRKCQYSQALHKQYGDVVRTGPNELSIIDTAAMQHLWNLPRGP  
MNVGISLSDKLVPLMGIQDPAEHARRRRPWNRGMSQAAVKEYEHVFAADVHLLVRRLEE QPGKADLAKWIEYLT  
YDFMCDMAFGGGSELLREGDKESVFSVMEHGLMVAGALMLVPWLVGYMGIYIPGAALATLHQTGTRFVLERLE  
RGSTTRDLFHYLNNEEDLPDTPPPRQHLVDDGILAVVAGSDTVSSTATSLIYCLITHPDAYADLKVVDKYHYPGDD  
PCNPRHYQDMHYLNAVINETLRIFHPAAAGGQRRVPWDSEPVVAGPYVIPPGTIIMMPQYTIHRDARYFSYPPDD  
WPERWLIASGDLRLEDARMPGKPKQLARGEVFNDAAFIPFGHGPICVKGALGVLEMRLTALVHKHFHFQAP  
QGW DAGTYPEIQIKEYVTVTRPPLPVVIKPRW

#### >CYP5035AU1

ATGTTGAAACGAGCGTATTTCGAGTCTCGGACCGTTTCGGTGGCTCTCGCACTGATTACACACCAAGTCTTTCGCC  
GCTACGAGACATACTCATGGTTTATTTCACGGGTGTCTTTTGTTCGGACCGCTACGCTAGTTGCGACCTTCGTCTC  
CGCACTGCGGATACTACTCGAAGCCTTCTGCAGGGTTTTTTCAGGGCGCTCCCAATACACCTCATCACGCTGTCC  
ATCTCGGTGATACTCTATCGTTTGTCCCTTACATCCGCTCGTGGGTATCCTGGACCTCTTTCGAGGAAGGTGT  
CCATGCTGGTTCCGGCATACTGTCTGTTATCAGGACGGAAGTGCCAGTACAGTACAGGCACTCCATAAGCAGTATG  
GGGATGTGCTGCGTACAGGGCCGAACGAGTTGTGCGATCATCGACACCGCGCTATGCGACATCTGTGGAATTTGC  
CTAGGGGTCCGATGAACGTTGGAATATCTCTCTCGGACAAGCTCGTCCCTTGTGATGGGCATCCAGGACCCGGCGGA  
GCACGCACGCCGACGTCGGCCTTGAATCGAGGAATGAGCCAAGCAGCGGTGAAGGAGTACGAACACGTTTCCG  
AGACCGCTGCATTTGCTGGTCCGACGCTCTCGAAGAGCAGCCGGGCAAAGCGGACCTTGCAGAAATGGATTGAGTA  
CTTGACATATGACTTCATGTGCGACATGGCGTTTCGGAGGCGGCTCAGAGCTGCTGCGAGAGGGAGACAAGGAGAG  
TGTCTTTTTCGGTCATGGAGCACGGTCTCATGGTGGCCGGTGCCTAATGCTCGTCCCGTGGCTTGGCGTATACATG  
GGATACATCCCGGTGCTGCGAAAGCACTTGAACCTCTCCACCAGACCGGTA TAGATTCTGCTCCTCGAGCGTTTTGG

AGCGCGGGTTCGACTACGCGTGATCTCTTCCACTATCTCAACAACGAGGACCTCCCAGATACGCTCCGCCGCCACG  
ACAGCACCTGGTTGACGATGGAATTCCTTGGCGTTGTGCTGGCTCCGACACGGTCTCCAGCACGGCGACGAGCCTG  
ATCTACTGCCTCATCACGCACCCGGACGCGTACGCAGATCTGAAGGTGGAAGTGGACAAGTACTACCATCCCGGGG  
ACGACCCCTGTAATCCCGCCATTATCAAGACATGCATTATTTGAACGCTGTGATAAACGAGACTCTTCGTATCTT  
CCATCCGGCAGCCGAGGTGGTCAACGCCGCTTCCCTGGGATTCAGAACCAGTCGTGGCAGGCCCTACGTGATC  
CCTCCCGGAACGATCATCATGATGCCAGTACACCATCCACCGCGACGCGGATACTTCTCCTACCCGGACGATT  
TCTGGCCCGAACGGTGGCTCATCGCTCCGGCGACCTACGCTCGAGGACGCGCGCATGCCGCCGGGAAGCCCA  
GCTTGCACGAGGCGAGTTCGTGCACAACGACGCCGCTTATCCCGTTCGGACACGGGCCATCCACTGCGTCCGG  
AAGGCCCTCGGTGTCTTGGAGATGCGCATGCTGACGTGTGCGCTGGTGCACAAGTTCCTACTTCCAGGCTCCGAGG  
GGTGGGATGCGGGGACGTATCCGGAGCAGATCAAGGAGTATGTGACGGTGCAGAGGCCGCTCTGCCGGTCTGCA  
TCAAGCCGAGGTGGTAG

3. **CYP5035N6 of *P. arcularius*** (JGI: 521854;NCBI accession number: TFK87858.1)

MFRRHETYSIAIHALLLFGAPLLLVGTASTLTFGVLLSACWTYLVTLILSILLYRSLHLHPLSKYPGPICCRASKLWH  
ACVVLKGRQHEYLQALHERYGDVVRIGPNDLSIRDASLIPAILGASGVPKGNFHFHGSMLTATNPPMVGIQDTRLHLA  
RRRPWARGLALSALKEYHRLVGRKRNQLVHLLNRHGTVVVLGEMFDYFSYDLMCDMAFGGGAELMEEGDPKQ  
VWCLLTEGLEAGASFHQMDWLVGVYFGHIPAVVKPLQTFHGHKTLALERMQRGSTRRDLFHYLNEEDLPERTSPP  
LQQLVDDGILAIVGGSDTSSCLTSVFFALLTHPETVYKLAQEVKYPAGENPCATKQHRDMTYLHAVINEALRLF  
PPVMTLSTRKVPARAPGVHIRSLYPPGTSISIPPYALQRDPNFSFSAFWPERWLIASGQIKLEDAPPPAAASSRT  
FEFVHNEVAFMAFVSHGPMNCVKGKGFALQEI RTVVCALLQRFSFRLGEGWDPREYEATVRDYIVSSRPALPVILERR  
TSS

>**CYP5035N6**

ATGTTTCGTAGACACGAGACGTAATCGCCATCCACGCACTTCTGCTCTTCGGAGCGCCTCTTCTGTTGACCG  
TCGGTACGGCCTCGACGCTGACGTTCCGGCTCCTGCTGAGTGCCTGCTGGACTTACCTTGTGACCCTCATCCTCTC  
GATCTTGCTCTACCGTCTTTCGCATCTCCATCCACTTCTAAGTATCCCGGTCCTATCTGCTGCAGGGCGTCAAG  
CTCTGGCACGCTCGCTGTTGAAAGGACGGCAGCAGTATCTACAAGCATTGCACGAGGATATGGAGAC  
GTTGTTTCAATAGGGCCGAACGACTTGTCTATCCGCGACGCTCTCTCATTCTGCGATCTGGGAGCCTCAGGTG  
TGCCGAAAGGCCGAACCTCCATGGGTCGATGTTGACCGCGACCAACCCGCCCATGGTCCGCATACAAGATACTCG  
GCTGCACCTGGCACGCGCAGTCCGTTGGGCGCGCGGCTGGCTCTGTCCGCTCTCAAGGAGTACCATCGACTGGTT  
GGGAAGAGAACAACCAGCTCGTGCACCTTCTGGAGAACCGCCATGGAACGGTGTGGTACTGGGCGAGATGTTT  
GACTACTTCAGCTACGACCTCATGTGCGATATGGCATTCCGGCGAGGCGCTGAGCTCATGGAGGAGGGAGATCCG  
AAGCAAGTATGGTGCTTCTTACCAGGGTCTCGAGGCTGGCGCATCCTTCCACCAGATGGACTGGCTCGGCGTGT  
ACTTCGGACACATCCCCGAGTAGTGAAACCACTTCAAACGTTTCTCACGCATGGCAAGACCCTTGGCCTGGAGAG  
GATGCAGCGCGGCTCCACAAGGCGGACTTGTCCACTATCTAAACGAAGAGGATCTCCCTGAAAGGACATCGCC  
ACCGCTGCAGCAGCTCGTCGATGACGGCATTCTCGCTATCGTGGGCGGTTCTGATACCACCTTAGCTGCCTCAG  
AGCGTCTTCTTGGCCTTCTCACCCATCCAGAGACATACGTGAAGTTCAGGCCGAGGTCGACAAGTACTATCCGG  
CTGGAGAAAACCCCTGCGCGACCAAGCAGCACCAGCAGATGACGTACCTGCATGCAGTGCATCAACGAGGCTCTCAG  
GCTCTTCCCGCCGTCATGACCTTGTGAGTACGCGCAAGGTCCCGCTCGTGCGCCCGGAGTGCACATCCGGTCCCTA  
TACATACCCCGGGACTTTCGATTTCCATCCCGCCGTACGCACTCCAACGTGACCCACGGAATTTACGTTTCCGA  
GCGGTTTCTGGCCGAACGCTGGCTCATCGCTCCGGCCAGATCAAACGAGACGCTCCTCCGCTGCCGCGG  
GTCGAGTGCACCTTTCGAGTTTGTGCACAACGAAGTGCCTTTCATGGCGTTCTCGCACGGGCCATGAACTGTGTC  
GGCAAGGGTTTCGCTTTCGAGGAGATCCGGACGGTGGTGTGCACTCCTGCAGCGCTTCTCATTCCGGTTGGGGG  
AGGGCTGGGATCCGAGGGAGTACGAGGCTACGGTACGGGACTACATCGTCTTCTCGGCCCGGCTTCTGTGAT  
CCTTGAGCGGAGGACGTCGAGTTGA

4. **CYP5035S6 of *P. arcularius*** (JGI: 652223; NCBI accession number: TFK89222.1)

MRVVGQSAVPTIILALIAHQIFRRHETYYISVHASLLFGVPAGVVLALCWGSHPANALHIGLEVFKTYLITLGISVAVY  
RVSPWHPLARFPGPYLRRISHFVSACIYIPGNRSRHFALHRQYGDVVRTGPNELCIVDPSMIPHILGVPVPGKPIW  
VGGSLSYKTLPLVGIADTEEHMLRRRAWNRGLAPPALREYEVVTSRAKQLVQRLQEQVEMNLGDWMNRFTYD  
FMSDMAFGGGSELLNDGDKDNMWTTISDAMKIAMFLGHVPWLGVYLYIPPAVSQKRLLSRGEELAAQRLARGS  
TTRDLFHLYLNEDLPDKEPAPRRQLIDDGVLAVVAGSDTTSIVLSTFYCVLTNPDAYEELQAEIDRHFPQGGDPYI  
TQHHRNMPYLQAVINEALRLFPPVPGTERRVPQHGEVPIAGSLRIPPPTSIFMPPWVLRDARNFTFPTSFWPER  
WLIASGQLSLEKARLPSIRSPPWAQAGDQGAHPVDFVHNESAYIPFSYGPMPNCPGKGLALMELRMVVTAVFQRFK  
IRLREGWDPSEYDSGFKDYFNATRPELPTLERR

>**CYP5035S6**

ATGAGGGTCGTCCGACAATCCGCCGTGCCGACAATCATCCTAGCTCTGATCGCACACCAGATTTTCCGCCGGCAGC  
AGACATACTACATCTCGGTTTCATGCTTCTTGGCTTCTCGGCGTCCCTGCAGGCGTGGTCTTGTCTCTGTTGGGG  
GTCTCACCTGCAAATGCGCTCCACATTGGCCTAGAAGTCTTCAAACGATCTGATCACCTTGGGTATCTCCGTG

GCCGTCTACCGCGTCTCTCCCTGGCACCCCTCGCGCGCTTCCCTGGCCCGTATCTCCGCCGGATATCACACTTCGT  
TTCTGCATGCATTTACATTCCGGGAAACCGCTCCCGACACTTCGCTGCACTGCACAGACAATATGGTGACGTGGTG  
CGGACAGGTCCAAACGAGCTTTGTATCGTGATCCGTCTATGATCCCCATATCCTTGGGGTCCCGGGAGTCCCCA  
AAGGCCAATTTGGGTGGGTGGGTCTCTGTCTACAAGACCTCCCGTTGGTTGGCATTGCTGACACGGAGGAGC  
ATATGCTGCGAAGACGCGCATGGAATCGCGGTCTTGTCTCCAGCACTCAGGGAATACGAGGTCGTCACCGCATC  
GAGAGCGAAGCAACTCGTCCAGCGGCTTCAAGAGCAGGTTCGAGAGATGAACCTCGGCGACTGGATGAATCGTTT  
TACATATGACTTCATGTGACAGCATGGCCTTTGGCGGAGGATCCGAACCTTCTCAACGATGGAGACAAGGATAATAT  
GTGGACGACTATCAGCGACGCAATGAAAATCGCGATGTTCTTAGGTCACGTTCCCTTGGCTAGGTGTCTACCTCGG  
CTACATCCCGCCGGCGTTAGCCAGCTGAAGAGACTGCTGTCTCGTGGAGAAGAGTTGGCGGCGCAGCGACTGGCA  
CGAGGGTCCACCACTAGGGATCTATTCCACTATCTTAATAACGAAGACCTTCCAGACAAGGAGCCGGCTCCTCGTC  
GTCAGCTCATCGACGATGGGGTACTCGCCGTGGTAGCCGGCTCCGATACCAGTCTATCGTGCTTACATCAACCTT  
CTACTGCGTGCTGACGAACCCGGACGCGTACGAAGAACTTCAAGCAGAGATTGACAGGCACTTCCCTCAGGGCGA  
CGACCCGTACATCACTCAGCACCATCGCAACATGCCCTATCTGCAAGCGGTGATTAACGAAGCCCTTCGCCTCTC  
CCTCCAGTTCCCGGCGGCACCGAGCGTCCGCTTCCGCAACACGGTGAACCTGTCATTGCGGGATCCTTACGCATTC  
CACCCGGTACTTCCATCTTATGCCCCCATGGTCTCCATCGCGATGCGCGCAACTTACCTTCCCAACCTCGTTC  
TGGCCTGAGCGTTGGCTCATTGCGTCCGGGCAACTCTCGTGGAGAAGGCTCGTCTTCCCTCTATTTCGCTCTC  
CTTGGGCTCAGGCTGGAGACCAAGGGGCTATCCACCCGGTTGATTTTGTGCACAACGAGAGCGCGTACATCCCGTT  
CTCGTACGGCCCGATGAACTGTCTGGGAAGGGGCTGGCCCTGATGGAGCTGCGCATGGTCTGACGGCAGTGTTC  
CAGCGCTTCAAGATCCGTCTCCGTGAGGGCTGGGACCCGAGCGAGTACGACAGCGGCTTCAAGGACTACTTCAACG  
CCACTCGTCCGGAGTTGCCGTTTACTGGAGCGGCGTTGA

5. **CYP5035S7 of *P. arcularius*** (JGI: 664247; NCBI accession number: TFK85799.1)

MSLREVSPLTIPLAIATHQVFRRYEIVSVHACLFLVPPALVAHISSQSYSPSSIPATFVIALVSYVAAIAASVIVYRL  
SPLHPLARYPGPVWRKVMIGPAILATTGNRAWAFADMHRKYGDIVRSGPNELSIIDPSFIGPLLASGLPKGPYHV  
GASVTPEHVSMAGLQDIPYHLQRRRPWNRGLNPSALKDYQPLIVERLQLLVRRLHEQSGIIDLGLWLKYFAYDFMS  
DMAFGGSELLKDGDKNNIWSIIEGMVFATILHTLPWLGAYLFKIPGSVKPLLAMQQTARLAERFKRGSKTRD  
LYYLSNEDLDPKPPPLRELADDGVLAVVAGSDTASLTMTSVFYLLTHPEAYTKLQEIDTSYHPGEPNAGTKR  
HREMPYLHAVINEALRLFPVPLGTQRQVPHDASPVVFGSVVIPPPTSVYLPPTLALHRDPRNFTCADDFFWPERWLI  
ASGQLRYKEARRPSSLKAADLPDFVHNDVAFTPFSVGP MNCPGKGLAMLEMRMVIVELVKNFVFKLWDGWD  
PATYEKEFKDYFTAARPLPVVLEPRQL

>**CYP5035S7**

ATGTCTCTACGTGAAGTATCTCCACTGACGATAACCGCTCGCTATTGCTACGCATCAGGTATCCGACGATATGAGA  
TCTACAGTGTCTCCGTCCATGCCTGCCTTTTTCTCGTCCCGCCCGCCTTGTGTCAGCGCACATCTCCTCGCAATCG  
TACTCTCCGTCGTCAATCCCAGCGACGTTCTGTAATTGCACTGGTATCCTATGTGGCTGCTATTGCTGCGTCCGTCA  
TCGTGTACCGACTTTCTCCGCTCCATCCGCTTGCACGATAACCCGGTCCGGTCTGGCGCAAAGTGTCCATGATCGG  
ACCTGCAATACTGGCGACCACTGGCAACCGGGCTTGGGCATTGCGAGACATGCACAGGAAGTATGGGGACATCGT  
CCGCAGTGGACCGAATGAGCTGTCTATCATAGATCCCTCATTTATTGGGCCTCTGCTGGGTGCCTCGGGTCTTCCG  
AAAGGTCCTTATCACGTCGGCGCATCTGTAACCTCCGAGCACGTATCCATGGCCGGCCTGCAGGATATAACCGTACC  
ATCTGCAACGCCGACGTCCTGGAACCGAGGGCTGAACCAAGCGCTCTGAAGGACTATCAACCTCTGATCGTCA  
GAGACTCCAGCTCCTTGTCCGAAGGCTCCACGAACAGTCCGGTATCATCGACCTCGGACTATGGCTCAAATACTTC  
GCGTACGACTTCATGTCTGACATGGCGTTTGGCGGAGGATCAGAGTTGCTGAAAGACGGTGACAAGAACAACATC  
TGGTCCATAATCGAGGAAGGCATGGTCTTTGCAACCATACTCCACACTCTGCCTTGGCTGGGCGCGTACCTATTCA  
AGATTCTGGCAGCGTCAAGCCTCTACTTGAATGCAGCAGACCACCGCTCGACTCGCCGAGGAGCGGTTCAAGCG  
AGGCTCCAAAACCCGGATCTGTATTACTACCTCAGCAATGAAGATCTCCAGACAAGCCTCCTCCGCCTTTGCGG  
GAGCTCGCAGACGACGGCGTCTGGCAGTCTTGGCGGCTCAGATACCGCTTCTTACCATGACGAGCGTGTTC  
ACCTTCTCCTCACACACCCGGAGGCTTATACGAAGCTGCAAGAAGAAATCGACACCTCATATCATCCTGGTGAGCC  
CAACGCGGGGACGAAGCGTCATCGTGAGATGCCCTACTTGCATGCAGTAATAAACGAAGCTCTCCGGCTCTTCCCG  
CCGGTCCCTCTGGGTACTCAGCGTCAGGTACCTCACGACGCTCCCGGTCGTATTCGGTCTGTGCTGATCCCTCC  
GGGAACCTCCGTGTACCTGCCGACATTGGCACTCCATCGCGATCCTCGCAACTTACCTGCGCGGACGACTTTTGG  
CCAGAGCGCTGGCTCATTGCGTCCGGCCAGCTGCGCTATAAAGAGGCGCGACGTCGGCCCTCCTTGTCTAGCCTGA  
AGGCGGCAGACCTTCCCGACTTCGTTACAACGATGTGCCTTACGCGGTTCTCTGTAGGACCTATGAATTGTCC  
CGGGAAGGGCTTGGCGATGCTGGAGATGCGCATGGTTCATCGTTCGAGCTGGTGAAGAATTCTGTTCAGGCTGTG  
GGACGGATGGGATCCGGCGACGTACGAGAAGGAGTTCAAGGACTACTTTACTGCCGCTCGGCCCGGATTGCCTGT  
CGTTCTCGAGCCGAGACAGCAACTGTAA

6. **CYP5035S8 of *P. arcularius*** (JGI: 665466; NCBI accession number: TFK83982.1)

MSLREVSLLTIPFAILAHQVLRRYEYRIYVHACLLLGPPILAAARLTSFRPTPALPPILFNSLVSYLAALVTSVIAAYRL  
SPFHPLAQYGPPLWRRISMFGPAAMATTGNRHRASFALHVKYGDVVRTGPNELSIADASFVGPPLGASGLPKGPN  
HVGASMSDTKMSMVGIQDIPHHLQRRRPWNRGLSQQALKGYEPLMAERAQLLVQRLTQSGPVDLGLWLKYFAY

DFMSDVAFGDGSDDLREGDKANIWSIHEDGMVVCTIAHSLPWLGIYLSMIPSAAGPMLAFQENGRRLARERLERGS  
KTRDLYHYLCNEDLSDNPPPTLDELADDGTLAIVAGSDTVSVALTSVFYCLLTDTEAHRNVQQEIDRLYPVGEFSE  
TKHHREMHYLAQVINEAMRLFPPILGSQRQVPHDAASVVVGSVVIPPGTAIYLPPWVLQRDPRNFTFPDAFWPE  
RWLIASGQLHYGDARLPSSAKRGHERPDFVHHEATFIPFSAGPMNCPGKGLAMMEMRSVVIALMKNFGMKLRDG  
WNPATFDQEFKDYFTAARPELPPVLEPRLHVETKAYE

**>CYP5035S8**

ATGTCTCTACGTGAGGTGTCTTTGCTGACGATTCCCTTTGCTATCCTCGCCCATCAGGTGCTCCGCCGGTACGAGA  
CGTATCGTATCTACGTCCACGCCTGTCTATTGCTCGGACCGCCCATCCTGGCTGCAGCGGCCCTCACCTCGTTTCG  
ACCGACTCCCGCACTTCCCCCATACTCTTTAACTCTCTGGTATCCTATCTGGCTGCCCTCGTCACTTCCGTATCG  
CTTACCGGCTCTCGCCATTCCACCCCTTGACAAATATCCCGGGCCTCTCTGGCGCAGAATCTCCATGTTCCGACCC  
GCGGCGATGGCGACCACAGGGAACCGTCATAGGGCGTTCGCTAGTTTGCATCAGAAGTACGGAGACGTCGTCGGA  
ACCGGTCCGAACGAGCTTTCTATCGCTGATGCGTTCGTTAGGGCCGTTACTGGGGCCCTCCGGCCTTCCGAAGG  
GTCCCAATCACGTCGGAGCCTCGATGTCCGATACCAAGATGTGATGGTGGGCATACAAGACATACCCACCATCT  
TCAGCGCCGCCCGCTGGAATCGCGGACTCAGTCAACAGGCTCTGAAAGGATACGAGCCGCTCATGGCGGAGCGC  
GCCAGCTTCTCGTACAGCGGCTCACGCAGCAATCAGGACCAGTCGATCTGGGACTCTGGCTGAAGTACTTCCGCT  
ACGACTTCATGTGCGATGTGGCGTTCCGGTATGGGTCCGACCTCCTCAGGGAGGGTGACAAGGCCAACATCTGGT  
CGATCATCGAGGACGGAATGGTCTGTACGATCGCGCATTCACTCCCCTGGCTGGGCATCTACCTGTCCATGAT  
TCCCAGTGGCGCCGGCCGATGCTTGCCTTCCAGGAGAATGGTAGACGGCTTGTAGGGAGCGGCTCGAGAGGGG  
CTCGAAGACGCGGGACTTGTACCACTACCTCTGTAACGAGGATCTCTCTGACAATCCACCTCCGACGCTGGACGAG  
CTCGCGGACGACGGGACCCTGGCCATCGTGGCAGGGTCCGACACCGTTTCCGGTGGCGTTAACGAGCGTTTTCTATT  
GCCTTCTGACAGACACCGAGGCGCACAGGAATGTGCAACAGGAGATTGATAGGTTATACCCGGTTGGCGAGCCCT  
TTTCAGAGACGAAGCATCATCGCGAGATGCATTACCTTCAAGCCGTCATCAACGAAGCTATGCGGCTCTTTCGCGC  
CATTCCGCTAGGATCGCAGCGTCAAGTACCTCAGATGCCGCTTCCGTGGTGGTGGATCTGTGCTCATCCCTCCG  
GGTACAGCCATATACTTCCCGCTTGGGTACTGCAACGCGACCCGCGCAACTTCCACTTCCCCGACGCATCTGGC  
CCGAGCGCTGGCTGATCGCGTCTGGTCTCAGCTACACTACGGGGATGCGCGACTGCCGTCTTCCGGGAAGAGAGGACA  
CGAACGTCCAGACTTCTGTCACACGAGGCTACGTTTATCCATTCTCCGCTGGTCCGATGAACTGCCCCGGGAAG  
GGCCTTGGCATGATGGAGATGCGCAGCGTCTGTCATCGCACTGATGAAGAAGTTCGGGATGAAGCTGAGAGACGGG  
TGGAATCCGGCGACGTTTCGATCAGGAGTTCAAGGACTACTTCACTGCGGCGGACCTGAGTTGCCTGTGGTGCTTG  
AGCCACGACTGCATGTGAGACAAAGGCCTACGAGTGA

**7. CYP5035AV1 of *P. arcularius* (JGI: 667965; NCBI accession number: TFK79795.1)**

MSTMWYSLAVSALIAHESFKRYETYSIRAHTALLGPPSLALGFLGSTGSSRSVLHTLPLAYAAYVVGALTVYTYLRYI  
SPFHPLAQYPGLGCKVQVWWMACKSWSGYEHLIYSELHRKYGDVVRIGPNELSIKDASAIPIMSIAKGPQYVGR  
MLSDGIHLPIIGIQDPAEHLRRRRPWNRAFTVPALRGYEETIARRARQLVDALERHNGQEIVLKGWVFNDFAYDF  
MCDMAFGGSELQERDDSNVWRVLDDEGMKVGTLAHVPWLGVYLSHVPLATGALDVLISHCRMLTTQRVQRG  
ATQKDLFHYNDEDLANSSEKPRAPPLRQLTDDGCLIVVAGADTTSSALTSFYCLLTPETRYRLQDEVDKFPY  
RGEDACDTRYHREMRWLNAVICETLRLFPVPGGSQRQVPHNSAIGVMAGDAFIPPGTSVWAHTWSIHRDPRNFS  
RPDAFWPDRWLLASTTLRSPSSASSSVEADGVRDFVHNEADAWIPFAQQQMNCVGNLALLEIRMVVCALMQRF  
EMRLSEGWDAREYERKFRAYLVATRPEMPVRLRVRT

**>CYP5035AV1**

ATGTCGACAATGTGGTACAGCTTGGCCGTATCAGCCTTGATTGCGCACGAGAGTTTCAAGCGCTACGAGACCTAC  
TCTATCCGCGCGCACACCGCGCTGCTCCTCGGCCCTCCTAGTCTTGCATTGGGATTCTCGGCTCCACCGGTTTCGAG  
TTCACGAAGTGTCTCCATACGCTGCCCTCGCGTATGCTGCATACGTCGGCGCTTAAACAGTCTACACTATTCTC  
TACCGCATATCGCCCTTCCACCACTCGCTCAGTATCCCGTCCGCTGGGATGCAAGGTATCGCAGTGGTGGATGG  
CATGAAATCCTGGTCTGGATACGAACACCTGTACATCAGCGAGCTGCACCGCAAGTACGGGGACGTTGTCCGCAT  
CGGCCAAATGAGCTCTCGATCCGGGACGCGTCTGCGATCAGTCTATCATGAGCATTGCAAAAGGCCCGCAGTAT  
GTCGGACGCATGCTCAGCGATGGGATCACTTGCCTATAATTGGGATTCAAGACCCTGCCGAACATCTGCGCCGCC  
GCCGTCCATGGAACCGCGCTTACAGTGCCGGCGTTGAGAGGGTACGAGGAGACGATAGCGGGAGAGCGCGGC  
AGCTGGTTCGATGCACTCGAGCGTCATAACGGAGGACAGGAAGAGGTCATACTTGGGAAATGGTTCAATGACTTTG  
CCTATGACTTCATGTGTGACATGGCGTTTGGCGGTGGTTCTGAGCTACTGCAGGAACGAGACGACGTAACGTTT  
GGCGGGTCTGGATGAGGGCATGAAAGTTGGCACGCTTCTCGCACATGTCCCCTGGCTAGGGGTGTATCTGAGCC  
ACGTCCCCTTGGCACCGGGCACTGGACGTTCTCATCTCGCACTGCCGATGCTCACACCCAGCGGGTCCAGCG  
GGGCGCTACGCAGAAAGACTTGTTCATTACCTGAACGACGAAGACCTCGAAAATTCCTCCGAGAAGCCTCGGGC  
ACAGCCTCCACTGCGTCAACTCACGGACGACGGTGCCTCATCGTTGTGCGCGGGCGGGACACCAGTCAAGCGCA  
CTTACTAGCCTGTTCTACTGCCTGTTGACGAACCCGGAGACATACAGACGGCTGCAAGACGAGGTGGACAAGTTC  
TATCCGCGTGGAGAAGACGCTTGGCAGACGAGATACCATCGCGAGATGCGCTGGCTGAACCGGTAATATGCGAG  
ACGTTGCGACTGTTCCCTCCAGTCCCGGGCGGAAGCCAGAGACAAGTGCCGCATAACAGCGCAATAGGCGTCATG  
GCAGGTGATGCGTTCATCCCGCCCGAACTTCCGGTTTGGGCACACACTTGGTCCATCCACCGAGACCCGCGCACT

TCTCCCGCCCTGACGCATTCTGGCCCCACCGGTGGCTGCTGGCAAGTACAACATTGAGAAGCTCCCCCTCATCCGC  
ATCAAGTTCTGTGCGAGGCGGACGGGGTCCGAGACTTCGTGCACAATGAAGACGCTTGGATTCCGTTGCGCGAGGG  
ACAGATGAACTGCGTTGGCAAAAACCTTGTCTGCTCGAAATTCGGATGGTCGTATGTGCGCTGATGCAGCGCTT  
CGAGATGCGCCTGTCTGAGGGATGGGATGCGCGGGAGTATGAGCGGAAGTTCAGGGCGTACCTGGTTGCGACGCG  
TCCCAGATGCCGGTGAAGTTCGCGGGTTCGTTGTACGTGA

8. **CYP5035S9 of *P. arcularius*** (JGI: 668252; NCBI accession number: TFK79033.1)

MSLREVSPLTLPLALIAHQVFRRHETYRVAVHLSLLLAPPALVAAYVARSQPYSAFLLAFVNALLSYLAALVTSVVV  
YRLSSFHPLASYPGPVWRRVSMIGPAAATVSGNRHRTFADMHKQYGDIVRTGPNELSDPTFVEPLLGTGGLPKG  
PNHIGGNMSEETNLVGIWDIPYHLQRRRPWNRGLKQKQALKEYEPPLAERAQLLVQRLGDQSGSADLGLWLKDFY  
DFMCDMAFGGSELLRNGDKNNVWAIIEEGMVVCTVLHTLPWLGIYLGKIPSVVVKPMLLLQENGRQMAKKRLER  
GSKTRDLYHYLCNEDLSRSPPIAELADDGILTVVAGSDTASMTMTNVFYCLLTHPEAYAKLQAEIDKFYPAGEP  
ASETKHHRDMHYLHAVINEALRLYPVPLGSQRRVPHSGAPVVVGVSTVLPVPGTVVYLPWILHRDPRNFSFPDAF  
WPERWLITSGQLRHEDAQPSSAKDATKMDISGLVHNEAFTPFISGPMNCPGKGLAMLEMRTVIVSLMKNFSFK  
LRDGDWPAKFEELKDYFLVARPELPTIERRRIVT

>**CYP5035S9**

ATGTCTCTTCGTGAAGTATCTCCGCTGACCCTCCCCCTTGCTCTCATTGCACATCAAGTATTCGCGCGACACGAAA  
CTTATCGCGTCGCGCTCCATCTCAGCTTGCTGCTTGCCTCCTGCGCTCGTTGCGGGCGTATGTGCGCCGCTCTCAG  
CCGTACAGCGCATTCTCACGGCGTTCGTGAACGCTCTGCTGTCTACCTGGCTGCGCTCGTCACCTCCGTCGTCGT  
CTACCGGCTCTCCTCGTTCACCCGCTCGCGAGTTATCCCGGCCAGTGTGGCGAAGGGTCTCCATGATTGGGCCCT  
GCGGCTGCGACAGTCTCGGAAATCGCCACAGGACGTTTCGAGATATGCACAAGCAATACGGCGATATCGTTCGG  
ACTGGACCAACGAACATCCATAGTGGATCCAACGTTTCGTGAGCCCTCCTGGTACTGGCGGTCTCCCGAAGG  
GTCCGAATCACATCGGAGGCAATATGTGCGAGGAGACTAATCTGGTCGGCATCGTCGACATACCATACCATCTGC  
AGCGTCGCGCTCCCTGGAACCGCGTCTGAAACAGAGCGCGTGAAGGAGTACGAACCTCTCCTCGCTGAGAGAGC  
ACAGCTTCTCGTGACGCTCTCGGTGACCAGTCCGGTTCGGCGATTGGGATTGTGGCTGAAGTACTTCGGATAT  
GATTTTCATGTGTGACATGGCGTTCGGTGGTGGATCCGAGCTGCTCAGGAATGGCGACAAGAACAACCTCTGGGCA  
ATCATCGAGGAAGGATGGTGTGTGACGGTTCGTCACACCCCTCCCTGGCTGGGCATCTACCTTGGCAAGATTC  
CGAGTGTGGTCAAACCCATGTCTGTTGACAGGACGGAAGCAGATGGCTAAAAAGCGTCTCGAGAGAGGGT  
CGAAGACTCGGGACTGTACCACTACCTGTGCAACAGAGGATCTCTCCGACAGGAGCCCCCGGCCATCGCGGA  
TGCAGACGATGGGATACTTACAGTCTGCGAGGTTTCGGATACCGCCTCAATGACGATGACAAACGTTCTACTG  
CCTGTTGACGCACCCAGAGGCGTACGCGAAGCTGACGGCGGAGATCGACAAGTTCTACCCAGCTGGCGAGCCCGCT  
TCGGAGACGAAGCATCATCGGGATATGCACTACCTCCACGCTGTGATAAACGAAGCTCTCCGGCTCTATCCACCCG  
TCCCCTGGGCTCTCAGCGCCGGGTACCCACAGTGGCGCACCCGTTGGTAGTCGGCTCAACTGCTCTCCCGCCGGG  
TACGGTGGTCTACCTACCGCCCTGGATTCTCCACCGGACCCGCGCAACTTCAGCTTCCCCGACGCGTTCTGGCCGG  
AGCGCTGGTTGATCACGTCTGGCCAACCTCCGTACGAAGACGCGCAACCGCCGCTCCTCCGCGAAAGACGCGACGAA  
GATGGACATCTCGGGCCTCGTCCACAATGAAGCTGCGTTACGCGCTTCTCCATAGGCCCGATGAAGTCCCGGGG  
AAGGGCCTAGCGATGCTCGAGATGCGCACGGTCATTGTCTCGCTTATGAAGAATTCAGCTTCAAGCTACGTGAT  
GGGTGGGATCCGGCGAAGTTTGAAGGAGGCTGAAGGATTACTTCTAGTTGCGCGGCCGGAGTTGCCTGTGACC  
ATTGAGAGGAGGCGTATCGTAACATAG

9. **CYP5035H2 of *P. arcularius*** (JGI: 665169; NCBI accession number: TFK84406.1)

MVFQLPAHHALFTVVGSFAFVHLIFKRYEPHRVAVHALLLAVPSFSLVLLDRMPAIKALSASFLTFWTALVSSVA  
LYRLSPWHPLARYPGVSLRLSKLSMAWISRGRRHLYTQELHRRYGDIVRVGPNEVSVSNAAIHPLMGTSGLHK  
GPQWEARTATQSVLPLIAIGDPKEHLRRRKPWNRALNVASLKDFFVTHRAEQLVSRLASQKETTNLARWFGW  
FTYDLMSDMAFGGSEMMLNGDDGSVWPLLEIGLLNSDTYGHLPWMADYIRAVPSLGTNMKQMRFCIQRTEER  
IKLGNTSRKDLFYLLNEDGAEPVPPVPEVTADGTLAIVAGSDTSSVLSNVFYCLLTHPEAYARLRAEVDSSYPPG  
EDALNTKHHADMPYLNVINETMRLFPVTDGSQRIVPTGSGGRIIGDSYLPETITTVHMYSIQRDARNFAPLPDS  
FWPERWLHAAEGARSVIGMKLVHNPTAFFPFSYGPNCAGKGLALQEMRMVVSAMMQKLELSLAEGFDAVAYE  
NEMHDYLILSRPPLPVVVKQRKVCTAEA

>**5035H2**

ATGGTCTTTCAACTACCGCTCATCATGCACTATTCACCGTCTGCGCTCCGCATTTATTGTGCATCTCATATTCA  
AACGATATGAACCTCATCGCGTAGCCGTGCATGCTCTGCTGCTGCTTCCCGTACCTTCTTTTCTCAGTGTGCTCTT  
GCTTGATCGCATGCCGGTATCAAGGCACTCTCGGCGTCTTCTGACGTTTTGGACCGCACTGGTCTCCTCTGTA  
GCCCTCTATCGCCTGTCCCCGGCACCCACTGGCCCCGTACCCTGGTCCCGTTTTCTCTCAGGTTGTCCAAGTTGTC  
CATGGCGTGGATCTCCAGGGGCGGTAGACGTCACCTCTACACGCAGGAGCTTCATCGCCGCTACGGCGATATCGTC  
AGAGTTGGCCCAACGAAGTCTCGGTGAGTAACGCCGCGCTATCCATCCTCTCATGGGAACATCGGGGTTGCACA  
AGGGTCCCAATGGGAAGCTCGGACTGCCACGCAGAGTGTCTTCTTATCGCCATCGGGACCCGAAAGAGCA  
CCTGCGTCCCGCAAGCCATGGAACCGCGCCCTGAATGTGGCCAGCCTGAAGGACTTCAACCCCTTTGTGACACAC

CGCGCAGAGCAGCTCGTCAGCCGCTCGCATCACAGAAGGAGACGACCAACCTGGCGCGGTGGTTTGGGTGGTTCA  
CGTATGACTTGATGAGCGACATGGCGTTCGGCGGGGGTCTGAAATGATGCTCAACGGAGACGATGGCAGCGTTT  
GGCCCTTGCTCGAGATTGGCCTCCTAAATTCAGACACTTATGGTCATCTCCCATGGATGGCAGACTACATCCGCGC  
CGTGCCTAGTCTCGGCACGAATATGAAGCAGATGCGGAGCTTCTGCATCCAGCGCACCCGAGGAGCGTATCAAAT  
AGGTAACACGTCCCGAAGGACCTGTTCTACTACCTGAACAACGAAGATGGGGCCGAGCCGACTCCGCCTGTCCCT  
GAGGTGACAGCTGACGGAACGCTGGCTATCGTTCGCGGGCTCAGACACCACGTCGAAGCGTGTCTCGAACGTCTTCT  
ATTGCCTCCTCACGCACCCAGAGGCATACGCCCGCTGCGGGCCGAGGTTGATTCTTACTACCCCCCGGAGAAGA  
CGCCCTCAACACGAAGCATCACGCCGATATGCCTTATCTGAACGCGGTGATCAATGAGACCATGCGTCTCTTCCCA  
CCAGTGACGGATGGAAGCCAGCGCATCGTGCAGGAGGTTAGCGGGCGGAAGGATCATCGGAGACAGCTACCTTCCG  
GAGGGCACCATCACGACGGTGCACATGTACAGCATCCAACGGGACGCTCGCAATTTGCCCCCTGCCAGACAGCT  
TCTGGCCCCGAGCGGTGGTTGCATGCTGCAGAGGGCGCGAGGAGCGTGATAGGCATGAAGCTTGTCCACAATCCAA  
CGGCGTTCTTCCCGTTCTCATAACGACCCGGAACTGTGCTGGGAAGGGATTAGCGCTCCAGGAGATGCGCATGGT  
CGTGAGTGCCATGATGCAGAAGCTGGAGCTGAGTTTAGCGGAAGGTTTTGACGCTGTCGCCCTACGAGAACGAGAT  
GCACGACTATCTCATACTGAGTCGGCCGCCACTGCCTGTGGTTGTCAAGCAGCGGAAGGTTGTACTGCTGAAGCT  
TAA

**10. P450 reductase of *P. pastoris*** (NCBI accession number: XP\_002494255.1)

MDTLDSLVLIAIALIAYFSKGLWKGEDDNSVHGVAGGFQTRDLVEILNSTNKKALVLYGSQTGTSSEYAHKYAR  
ELQSKFSIPTLCGDLSEFDNLNDIPEQVEGFITFFMATYGEGETDNAVIEFLKND AEDLSNLKYTVFGLGN  
STYEFYNQMGKTTNKRSELGAQLVGTGEGDDGQATMDEDFLAWKDSLFDTIKKDLHLEEHEVVYQPGLKVK  
NTALTTSSPNVSVGEPNKAYVLREDENLLQYGFDPHTHPYIAPISSRELCSETSERNCIHLEFDLSNTNLRYSTGDH  
LAVWPSNANEHVESFLKVFNLTKRSSFVDFIEFLDPTVTVHFPPFTTYEAVVRHHLEISGPISRQTLKQFIPYAPDQS  
TKQEVIRLSESKDVFHNEVTAKYYNLADLLFKVSKETPWNVFPNFIETMPNLQHRYYSSSSSLEKQTIHITAMIE  
AFTPTGSDHIVTGVTNLLWNIQLNQDKSTVKAPVSYDLNPNLFSFYKLPVHIRRSTFKLPSNPALPVIMIGPGT  
GVAPFRGFIRERCQVDNGTPNIGQSILYYGCRNSEQDFLYRDEWPTYSKKLGDKFKMYTAFSRENSHKVYVQHL  
LENSREFIELMDQGAFIYVCGDAGKMAKDVNKAIVEILIKEKGLSEEDATESIREFKTSNRYQEDVW

**>PpP450red**

ATGGATAACCTTGGACCTTTCTGTTTTGATTGCTATTGCCTTGGCTTTGATAGCTTACTTTAGCAAAGGATCTCTTT  
GGGGCAAAGAGGATGATAACTCCGTCACGGAGTAGCTGGAGGATTCAGACCAGAGACCTGGTTGAGATTTTGA  
ACTCTACCAACAAGAAGGCACTCGTCCTTTACGGATCACAAACAGGTACATCTGAGGATTATGCTCATAAGTACG  
CTCGTGAACCTGCAATCCAAGTTCAGCATTCCCACCCTCTGTGGAGACTTGTGAGAGTTGATTTTGAACAATCTGAA  
CGATATCCCAGAGCAGGTCGAAGGGTTCACTTTCATCACTTCTTTCATGGCTACGTACGGCGAAGGCGAGCCTACT  
GACAACGCCGTAGAGTTTATCGAGTTTCTTAAGAACGACGCCGAGGATCTGTCTAATCTGAAGTATACTGTGTTT  
GGGTTGGGTAACCTACTTACGAGTTCTATAATCAAATGGGTAAGACCACTAACAAGCGTTTCTCAGAACCTGGT  
GCTCAATTGGTTGGAACCTTTGGCGAGGGCGATGATGGTCAGGCAACTATGGACGAGGACTTCTAGCATGGAAA  
GATTCCTGTTTGATACAATCAAGAAGGATTTGCATTTGGAGGAACATGAAGTTGTCTACCAGCCAGGTCTAAAA  
GTAAAGGAGAACACAGCGCTTACAACATCTTCTCCTAATGTCTCTGTTGGTGAACCTAATAAGGCTTATGTTCTT  
CGTGAAGATGAGAATCTGCTGCAATACGGTCCCTTCGACCACACTCATCCTTACATTGCGCCCATCTCCAGCTCCA  
GAGAACTCTGTTCTGAAACTTCGGAGAGAACTGTATCCATCTAGAATTTGATCTCAGCAACACCAACTTGCCTT  
ATTCCACTGGCGATCATTTGGCCGTGTGGCCAAGTAATGCTAATGAGCATGTCGAGAGCTTTTTGAAAGTGTTC  
ACCTCACAGACAAAAGATCTTCTGTGTTTGATATTGAGTTCCTGGACCCTACTGTCACAGTTCACTTTCCGTTTCC  
AACCACATACGAAGCAGTTGTTTCGTATCACCTGGAAATTTCTGGACCAATCTCTAGACAGACATTGAAGCAATT  
CATTCTTATGCTCCCGATCAGTCTACTAACAGGAGGTAATCCGATTATCGGAGAGCAAAGATGTGTTCCACAA  
CGAAGTCACAGCAAAATACTATAACCTTGTGACCTCTTGTTCAAAGTCTCAAAGAACTCCATGGAATGTTCC  
ATTCAACTTCTGATCGAGACCATGCCTAATCTGCAGCATCGTTACTATTCTATCTCATCATCTTCATTAAGTGAA  
AAGCAAATTCATATCACCGCAATGATTGAGGCCTTCACGCCTACTGGAAGTGACCATATAGTGACAGGAGTC  
ACCACTAATTTGCTATGGAACATTCAGCTGAATCAGGACAAATCTACTGTTAAGGCGCTGTCTCCTATGATTTG  
AACGGCCCAAGAAATTTGTTTTCTCCATATAAACTTCCAGTTCATATCAGAAGGTCCACTTTCAAACCTCCAAGC  
AACCCGGCCCTGCCAGTGATCATGATTGGACCTGGTACTGGGGTAGCTCCATTCCAGAGGCTTTATCAGAGAAAGA  
TGCCAGCAAGTTGACAATGGAACCTCCTAATATTGGTCAATCTATCCTCTATTATGGCTGTAGAAATCTGAGCAG  
GATTTCTTTACCGTGACGAATGGCCAACATATTGGAAGAAGTTAGGAGATAAGTTCAAGATGTACACTGCGTTC  
AGCAGAGAAAATTCACACAAAGTTTATGTTGAGCATAGGTTATTGGAAAACCAAGGGAATTTATCGAACTGATG  
GACCAAGGTGCTTTTATCTACGTATGTGGAGATGCTGGTAAAATGGCTAAGGATGTAAATAAGGCGATTGTTGAA  
ATCCTCATTAAGAGAAAAGGATTGTCAGAGGAAGATGCTACAGAAAAGTATTAGAGAGTTCAAACCTTCCAACAG  
ATATCAGGAAGACGTTTGGTAA



- Binder M, Justo A, Riley R, Salamov A, Lopez-Giraldez F, Sjökvist E, Copeland A, Foster B, Sun H, Larsson E, Larsson K-H, Townsend J, Grigoriev I V., Hibbett DS (2013) Phylogenetic and phylogenomic overview of the *Polyporales*. *Mycologia* 105:1350–1373 . <https://doi.org/10.3852/13-003>
- Floudas D, Binder M, Riley R, Barry K, Blanchette RA, Henrissat B, Martínez AT, Otilar R, Spatafora JW, Yadav JS, Aerts A, Benoit I, Boyd A, Carlson A, Copeland A, Coutinho PM, de Vries RP, Ferreira P, Findley K, Foster B, Gaskell J, Glotzer D, Górecki P, Heitman J, Hesse C, Hori C, Igarashi K, Jurgens JA, Kallen N, Kersten P, Kohler A, Kües U, Kumar TKA, Kuo A, LaButti K, Larrondo LF, Lindquist E, Ling A, Lombard V, Lucas S, Lundell T, Martin R, McLaughlin DJ, Morgenstern I, Morin E, Murat C, Nagy LG, Nolan M, Ohm RA, Patyshakuliyeva A, Rokas A, Ruiz-Dueñas FJ, Sabat G, Salamov A, Samejima M, Schmutz J, Slot JC, St. John F, Stenlid J, Sun H, Sun S, Syed K, Tsang A, Wiebenga A, Young D, Pisabarro A, Eastwood DC, Martin F, Cullen D, Grigoriev I V., Hibbett DS (2012) The Paleozoic Origin of Enzymatic Lignin Decomposition Reconstructed from 31 Fungal Genomes. *Science* (80- ) 336:1715–1719 . <https://doi.org/10.1126/science.1221748>
- Justo A, Hibbett DS (2011) Phylogenetic classification of *Trametes* (Basidiomycota, *Polyporales*) based on a five-marker dataset. *Taxon* 60:1567–1583 . <https://doi.org/10.1002/tax.606003>
